# 1 Stratifying Lung Adenocarcinoma Risk with Multi-ancestry Polygenic Risk Scores in East 2 Asian Never-Smokers

3  
4 Batel Blechter<sup>1\*</sup>, Xiaoyu Wang<sup>1\*</sup>, Jianxin Shi<sup>1\*</sup>, Kouya Shiraishi<sup>2\*</sup>, Jiyeon Choi<sup>1\*</sup>, Keitaro  
5 Matsuo<sup>3\*</sup>, Tzu-Yu Chen<sup>4\*</sup>, Juncheng Dai<sup>5,6\*</sup>, Rayjean J Hung<sup>7\*</sup>, Kexin Chen<sup>8\*</sup>, Xiao-Ou Shu<sup>9\*</sup>,  
6 Young Tae Kim<sup>10</sup>, Parichoy Pal Choudhury<sup>11</sup>, Jacob Williams<sup>1</sup>, Maria Teresa Landi<sup>1</sup>, Dongxin  
7 Lin<sup>12</sup>, Wei Zheng<sup>9</sup>, Zhihua Yin<sup>13</sup>, Baosen Zhou<sup>14</sup>, Jiucun Wang<sup>15,16</sup>, Wei Jie Seow<sup>1,17,18</sup>, Lei  
8 Song<sup>1</sup>, I-Shou Chang<sup>19</sup>, Wei Hu<sup>1</sup>, Li-Hsin Chien<sup>4,20</sup>, Qiuyin Cai<sup>9</sup>, Yun-Chul Hong<sup>21</sup>, Hee Nam  
9 Kim<sup>22</sup>, Yi-Long Wu<sup>23</sup>, Maria Pik Wong<sup>24</sup>, Brian Douglas Richardson<sup>1,25</sup>, Shilan Li<sup>1,26</sup>, Tongwu  
10 Zhang<sup>1</sup>, Charles Breeze<sup>1</sup>, Zhaoming Wang<sup>27</sup>, Bryan A Bassig<sup>28</sup>, Jin Hee Kim<sup>29</sup>, Demetrius  
11 Albanes<sup>1</sup>, Jason YY Wong<sup>30</sup>, Min-Ho Shin<sup>21</sup>, Lap Ping Chung<sup>24</sup>, Yang Yang<sup>31</sup>, She-Juan An<sup>23</sup>,  
12 Hong Zheng<sup>8</sup>, Yasushi Yatabe<sup>32</sup>, Xu-Chao Zhang<sup>23</sup>, Young-Chul Kim<sup>33,34</sup>, Neil E Caporaso<sup>1</sup>,  
13 Jiang Chang<sup>35</sup>, James Chung Man Ho<sup>36</sup>, Michiaki Kubo<sup>37</sup>, Yataro Daigo<sup>38,39</sup>, Minsun Song<sup>40</sup>,  
14 Yukihide Momozawa<sup>37</sup>, Yoichiro Kamatani<sup>41</sup>, Masashi Kobayashi<sup>42</sup>, Kenichi Okubo<sup>42</sup>, Takayuki  
15 Honda<sup>43</sup>, H Dean Hosgood<sup>44</sup>, Hideo Kunitoh<sup>45</sup>, Shun-ichi Watanabe<sup>46</sup>, Yohei Miyagi<sup>47</sup>, Haruhiko  
16 Nakayama<sup>48</sup>, Shingo Matsumoto<sup>49</sup>, Hidehito Horinouchi<sup>46</sup>, Masahiro Tsuboi<sup>50</sup>, Ryuji  
17 Hamamoto<sup>51</sup>, Koichi Goto<sup>49</sup>, Yuichiro Ohe<sup>46</sup>, Atsushi Takahashi<sup>41</sup>, Akiteru Goto<sup>52</sup>, Yoshihiro  
18 Minamiya<sup>53</sup>, Megumi Hara<sup>54</sup>, Yuichiro Nishida<sup>54</sup>, Kenji Takeuchi<sup>55</sup>, Kenji Wakai<sup>55</sup>, Koichi  
19 Matsuda<sup>56</sup>, Yoshinori Murakami<sup>57</sup>, Kimihiro Shimizu<sup>58</sup>, Hiroyuki Suzuki<sup>59</sup>, Motonobu Saito<sup>60</sup>,  
20 Yoichi Ohtaki<sup>61</sup>, Kazumi Tanaka<sup>61</sup>, Tangchun Wu<sup>62</sup>, Fusheng Wei<sup>63</sup>, Hongji Dai<sup>8</sup>, Mitchell J  
21 Machiela<sup>1</sup>, Jian Su<sup>23</sup>, Yeul Hong Kim<sup>64</sup>, In-Jae Oh<sup>33,34</sup>, Victor Ho Fun Lee<sup>65</sup>, Gee-Chen  
22 Chang<sup>66,67,68,69</sup>, Ying-Huang Tsai<sup>70,71</sup>, Kuan-Yu Che<sup>72</sup>, Ming-Shyan Huang<sup>73</sup>, Wu-Chou Su<sup>74</sup>,  
23 Yuh-Min Chen<sup>75</sup>, Adeline Seow<sup>17</sup>, Jae Yong Park<sup>76</sup>, Sun-Seog Kweon<sup>21,77</sup>, Kun-Chieh Chen<sup>67</sup>,  
24 Yu-Tang Gao<sup>78</sup>, Biyun Qian<sup>8</sup>, Chen Wu<sup>12</sup>, Daru Lu<sup>15,16</sup>, Jianjun Liu<sup>76,79,80</sup>, Ann G Schwartz<sup>81</sup>,  
25 Richard Houlston<sup>82</sup>, Margaret R Spitz<sup>83</sup>, Ivan P Gorlov<sup>83</sup>, Xifeng Wu<sup>84</sup>, Ping Yang<sup>85</sup>, Stephen  
26 Lam<sup>86</sup>, Adonina Tardon<sup>87</sup>, Chu Chen<sup>88</sup>, Stig E Bojesen<sup>89,90</sup>, Mattias Johansson<sup>91</sup>, Angela  
27 Risch<sup>92,93,94</sup>, Heike Bickeböllner<sup>95</sup>, Bu-Tian Ji<sup>1</sup>, H-Erich Wichmann<sup>96,97,98</sup>, David C. Christiani<sup>99</sup>,  
28 Gadi Rennert<sup>100</sup>, Susanne Arnold<sup>101</sup>, Paul Brennan<sup>91</sup>, James McKay<sup>91</sup>, John K Field<sup>102</sup>, Michael  
29 P.A. Davies<sup>102</sup>, Sanjay S Shete<sup>103</sup>, Loic Le Marchand<sup>104</sup>, Geoffrey Liu<sup>105</sup>, Angeline Andrew<sup>106</sup>,  
30 Lambertus A Kiemeny<sup>107</sup>, Shan Zienolddiny-Narui<sup>108</sup>, Kjell Grankvist<sup>109</sup>, Mikael Johansson<sup>110</sup>,  
31 Angela Cox<sup>111</sup>, Fiona Taylor<sup>111</sup>, Jian-Min Yuan<sup>112</sup>, Philip Lazarus<sup>113</sup>, Matthew B Schabath<sup>114</sup>,  
32 Melinda C Aldrich<sup>115</sup>, Hyo-Sung Jeon<sup>116</sup>, Shih Sheng Jiang<sup>19</sup>, Jae Sook Sung<sup>64</sup>, Chung-Hsing  
33 Chen<sup>19</sup>, Chin-Fu Hsiao<sup>4</sup>, Yoo Jin Jung<sup>117</sup>, Huan Guo<sup>118</sup>, Zhibin Hu<sup>5</sup>, Laurie Burdett<sup>1,119</sup>, Meredith  
34 Yeager<sup>1,119</sup>, Amy Hutchinson<sup>1,119</sup>, Belynda Hicks<sup>1,119</sup>, Jia Liu<sup>1,119</sup>, Bin Zhu<sup>1,119</sup>, Sonja I Berndt<sup>1</sup>,  
35 Wei Wu<sup>13</sup>, Junwen Wang<sup>120,121</sup>, Yuqing Li<sup>79</sup>, Jin Eun Choi<sup>116</sup>, Kyong Hwa Park<sup>64</sup>, Sook Whan  
36 Sung<sup>122</sup>, Li Liu<sup>123</sup>, Chang Hyun Kang<sup>117</sup>, Wen-Chang Wang<sup>124</sup>, Jun Xu<sup>125</sup>, Peng Guan<sup>13,126</sup>, Wen  
37 Tan<sup>12</sup>, Chong-Jen Yu<sup>127</sup>, Gong Yang<sup>9</sup>, Alan Dart Loon Sihoe<sup>128</sup>, Ying Chen<sup>17</sup>, Yi Young Choi<sup>116</sup>,  
38 Jun Suk Kim<sup>129</sup>, Ho-Il Yoon<sup>130</sup>, In Kyu Park<sup>117</sup>, Ping Xu<sup>131</sup>, Qincheng He<sup>13</sup>, Chih-Liang  
39 Wang<sup>132</sup>, Hsiao-Han Hung<sup>19,133</sup>, Roel C.H. Vermeulen<sup>134</sup>, Iona Cheng<sup>135</sup>, Junjie Wu<sup>15,16</sup>, Wei-  
40 Yen Lim<sup>17</sup>, Fang-Yu Tsai<sup>19,133</sup>, John K.C. Chan<sup>136</sup>, Jihua Li<sup>137</sup>, Hongyan Chen<sup>15,16</sup>, Hsien-Chih  
41 Lin<sup>4</sup>, Li Jin<sup>15,16</sup>, Jie Liu<sup>138</sup>, Norie Sawada<sup>139</sup>, Taiki Yamaji<sup>140</sup>, Kathleen Wyatt<sup>1,119</sup>, Shengchao A.  
42 Li<sup>1,119</sup>, Hongxia Ma<sup>5,6</sup>, Meng Zhu<sup>5,6</sup>, Zhehai Wang<sup>138</sup>, Sensen Cheng<sup>138</sup>, Xuelian Li<sup>13,126</sup>, Yangwu  
43 Ren<sup>13,126</sup>, Ann Chao<sup>141</sup>, Motoki Iwasaki<sup>139,140</sup>, Junjie Zhu<sup>30</sup>, Gening Jiang<sup>30</sup>, Ke Fei<sup>30</sup>, Guoping  
44 Wu<sup>63</sup>, Chih-Yi Chen<sup>142</sup>, Chien-Jen Chen<sup>143</sup>, Pan-Chyr Yang<sup>144</sup>, Jinming Yu<sup>138</sup>, Victoria L.  
45 Stevens<sup>145</sup>, Joseph F. Fraumeni Jr<sup>1</sup>, Nilanjan Chatterjee<sup>1,146,147‡</sup>, Olga Y Gorlova<sup>148,149,150‡</sup>,

46 Christopher I Amos<sup>148,149,150‡</sup>, Hongbing Shen<sup>5,6‡</sup>, Chao Agnes Hsiung<sup>4‡</sup>, Stephen J Chanock<sup>1‡</sup>,  
47 Nathaniel Rothman<sup>1‡</sup>, Takashi Kohno<sup>2‡</sup>, Qing Lan<sup>1‡</sup>, Haoyu Zhang<sup>1‡</sup>

48  
49 <sup>1</sup>Division of Cancer Epidemiology and Genetics, National Cancer Institute, Rockville, MD,  
50 USA, <sup>2</sup>Division of Genome Biology, National Cancer Research Institute, Tokyo, Japan,  
51 <sup>3</sup>Division of Molecular Medicine, Aichi Cancer Center Research Institute, Nagoya, Japan,  
52 <sup>4</sup>Institute of Population Health Sciences, National Health Research Institutes, Zhunan, Taiwan,  
53 <sup>5</sup>Department of Epidemiology, School of Public Health, Nanjing Medical University, Nanjing,  
54 China, <sup>6</sup>Jiangsu Key Lab of Cancer Biomarkers, Prevention and Treatment, Collaborative  
55 Innovation Center for Cancer Medicine, Nanjing Medical University, Nanjing, China,  
56 <sup>7</sup>Prosserman Centre for Population Health Research, Lunenfeld-Tanenbaum Research Institute,  
57 Sinai Health, Toronto, Canada, <sup>8</sup>Department of Epidemiology and Biostatistics, National Clinical  
58 Research Center for Cancer, Key Laboratory of Molecular Cancer Epidemiology of Tianjin,  
59 Tianjin Medical University Cancer Institute and Hospital, Tianjin Medical University, Tianjin,  
60 China, <sup>9</sup>Division of Epidemiology, Department of Medicine, Vanderbilt University Medical  
61 Center and Vanderbilt-Ingram Cancer Center, Nashville, TN, USA, <sup>10</sup>Cancer Research Institute,  
62 Seoul National University College of Medicine, Seoul National University Hospital, Seoul,  
63 Seoul, Republic of Korea, <sup>11</sup>American Cancer Society, Atlanta, GA, USA, <sup>12</sup>Department of  
64 Etiology & Carcinogenesis and State Key Laboratory of Molecular Oncology, Cancer Institute  
65 and Hospital, Chinese Academy of Medical Sciences and Peking Union Medical College,  
66 Beijing, China, <sup>13</sup>Department of Epidemiology, School of Public Health, China Medical  
67 University, Shenyang, China, <sup>14</sup>Department of Clinical Epidemiology and Center of Evidence  
68 Based Medicine, The First Hospital of China Medical University, Shenyang, China, <sup>15</sup>Ministry of  
69 Education Key Laboratory of Contemporary Anthropology, School of Life Sciences, Fudan  
70 University, Shanghai, China, <sup>16</sup>State Key Laboratory of Genetic Engineering, School of Life  
71 Sciences, Fudan University, Shanghai, China, <sup>17</sup>Saw Swee Hock School of Public Health,  
72 National University of Singapore and National University Health System, Singapore, Singapore,  
73 <sup>18</sup>Department of Medicine, Yong Loo Lin School of Medicine, National University of Singapore  
74 and National University Health System, Singapore, Singapore, <sup>19</sup>National Institute of Cancer  
75 Research, National Health Research Institutes, Zhunan, Taiwan, <sup>20</sup>Department of Applied  
76 Mathematics, Chung Yuan Christian University, Chong-Li, Taiwan, <sup>21</sup>Department of Preventive  
77 Medicine, Seoul National University College of Medicine, Seoul, Republic of Korea,  
78 <sup>22</sup>Department of Preventive Medicine, Chonnam National University Medical School, Gwangju,  
79 Republic of Korea, <sup>23</sup>Guangdong Lung Cancer Institute, Guangdong Provincial Key Laboratory of  
80 Translational Medicine in Lung Cancer, Guangdong Provincial People's Hospital (Guangdong  
81 Academy of Medical Sciences), Southern Medical University, Guangzhou, China, <sup>24</sup>Department  
82 of Pathology, Queen Mary Hospital, Hong Kong, Hong Kong, <sup>25</sup>Department of Biostatistics,  
83 Gillings School of Global Public Health, University of North Carolina, Chapel Hill, NC, USA,  
84 <sup>26</sup>Department of Biostatistics, Bioinformatics & Biomathematics, Georgetown University  
85 Medical Center, Washington, DC, USA, <sup>27</sup>Department of Computational Biology, St. Jude  
86 Children's Research Hospital, Memphis, TN, USA, <sup>28</sup>Saville Cancer Screening and Prevention  
87 Center, Inova Schar Cancer Institute, Inova Health System, Fairfax, VA, USA, <sup>29</sup>Department of  
88 Environmental Health, Graduate School of Public Health, Seoul National University, Seoul,  
89 Republic of Korea, <sup>30</sup>Epidemiology and Community Health Branch, National Heart Lung and  
90 Blood Institute, Bethesda, MD, USA, <sup>31</sup>Shanghai Pulmonary Hospital, Shanghai, China,  
91 <sup>32</sup>Department of Pathology and Clinical Laboratories, National Cancer Center Hospital, Tokyo,

92 Japan, <sup>33</sup>Lung and Esophageal Cancer Clinic, Chonnam National University Hwasun Hospital,  
93 Hwasuneup, Republic of Korea, <sup>34</sup>Department of Internal Medicine, Chonnam National  
94 University Medical School, Gwangju, Republic of Korea, <sup>35</sup>Cancer Institute and Hospital,  
95 Chinese Academy of Medical Sciences and Peking Union Medical College, Beijing, China,  
96 <sup>36</sup>Department of Medicine, School of Clinical Medicine, The University of Hong Kong, Queen  
97 Mary Hospital, Hong Kong, Hong Kong, <sup>37</sup>Laboratory for Genotyping Development, RIKEN  
98 Center for Integrative Medical Sciences, Yokohama, Japan, <sup>38</sup>Center for Antibody and Vaccine  
99 Therapy, Research Hospital, Institute of Medical Science, The University of Tokyo, Tokyo,  
100 Japan, <sup>39</sup>Department of Medical Oncology and Cancer Center, and Center for Advanced  
101 Medicine against Cancer, Shiga University of Medical Science, Shiga, Japan, <sup>40</sup>Department of  
102 Statistics & Research Institute of Natural Sciences, Sookmyung Women's University, Seoul,  
103 04310, Korea, <sup>41</sup>Laboratory for Statistical Analysis, RIKEN Center for Integrative Medical  
104 Sciences, Yokohama, Japan, <sup>42</sup>Department of Thoracic Surgery, Tokyo Medical and Dental  
105 University, Tokyo, Japan, <sup>43</sup>Department of Respiratory Medicine, Tokyo Medical and Dental  
106 University, Tokyo, Japan, <sup>44</sup>Department of Epidemiology and Population Health, Albert Einstein  
107 College of Medicine, New York, USA, <sup>45</sup>Department of Medical Oncology, Japanese Red Cross  
108 Medical Center, Tokyo, Japan, <sup>46</sup>Department of Thoracic Surgery, National Cancer Center  
109 Hospital, Tokyo, Japan, <sup>47</sup>Molecular Pathology and Genetics Division, Kanagawa Cancer Center  
110 Research Institute, Yokohama, Japan, <sup>48</sup>Department of Thoracic Surgery, Kanagawa Cancer  
111 Center, Yokohama, Japan, <sup>49</sup>Department of Thoracic Oncology, National Cancer Center Hospital  
112 East, Kashiwa, Japan, <sup>50</sup>Department of Thoracic Surgery, National Cancer Center Hospital East,  
113 Kashiwa, Japan, <sup>51</sup>Division of Medical AI Research and Development, National Cancer Center  
114 Research Institute, Tokyo, Japan, <sup>52</sup>Department of Cellular and Organ Pathology, Graduate  
115 School of Medicine, Akita University, Akita, Japan, <sup>53</sup>Department of Thoracic Surgery, Graduate  
116 School of Medicine, Akita University, Akita, Japan, <sup>54</sup>Department of Preventive Medicine,  
117 Faculty of Medicine, Saga University, Saga, Japan, <sup>55</sup>Department of Preventive Medicine,  
118 Nagoya University Graduate School of Medicine, Nagoya, Japan, <sup>56</sup>Laboratory of Clinical  
119 Genome Sequencing, Department of Computational Biology and Medical Science, Graduate  
120 School of Frontier Sciences, The University of Tokyo, Tokyo, Japan, <sup>57</sup>Department of Molecular  
121 Biology, Institute for Advanced Medical Sciences, Nippon Medical School, Tokyo, Japan,  
122 <sup>58</sup>Department of Surgery, Division of General Thoracic Surgery, Shinshu University School of  
123 Medicine Asahi, Nagano, Japan, <sup>59</sup>Department of Chest Surgery, Fukushima Medical University  
124 School of Medicine, Fukushima, Japan, <sup>60</sup>Department of Gastrointestinal Tract Surgery,  
125 Fukushima Medical University School of Medicine, Fukushima, Japan, <sup>61</sup>Department of  
126 Integrative center of General Surgery, Gunma University Hospital, Gunma, Japan, <sup>62</sup>Institute of  
127 Occupational Medicine and Ministry of Education Key Lab for Environment and Health, School  
128 of Public Health, Huazhong University of Science and Technology, Wuhan, China, <sup>63</sup>China  
129 National Environmental Monitoring Center, Beijing, China, <sup>64</sup>Department of Internal Medicine,  
130 Division of Oncology/Hematology, College of Medicine, Korea University Anam Hospital,  
131 Seoul, Republic of Korea, <sup>65</sup>Department of Clinical Oncology, The University of Hong Kong,  
132 Queen Mary Hospital, Hong Kong, Hong Kong, <sup>66</sup>School of Medicine and Institute of Medicine,  
133 Chung Shan Medical University, Taichung, Taiwan, <sup>67</sup>Department of Internal Medicine, Division  
134 of Pulmonary Medicine, Chung Shan Medical University Hospital, Taichung, Taiwan, <sup>68</sup>Institute  
135 of Biomedical Sciences, National Chung Hsing University, Taichung, Taiwan, <sup>69</sup>Department of  
136 Internal Medicine, Division of Chest Medicine, Taichung Veterans General Hospital, Taichung,  
137 Taiwan, <sup>70</sup>Department of Respiratory Therapy, Chang Gung University, Taoyuan, Taiwan,

138 <sup>71</sup>Department of Pulmonary and Critical Care, Xiamen Chang Gung Hospital, Xiamen, China,  
139 <sup>72</sup>Department of Internal Medicine, National Taiwan University Hospital and College of  
140 Medicine, Taipei, Taiwan, <sup>73</sup>Department of Internal Medicine, E-Da Cancer Hospital, I-Shou  
141 University and Kaohsiung Medical University, Kaohsiung, Taiwan, <sup>74</sup>Department of Oncology,  
142 National Cheng Kung University Hospital, College of Medicine, National Cheng Kung  
143 University, Tainan, Taiwan, <sup>75</sup>Department of Chest Medicine, Taipei Veterans General Hospital,  
144 and school of Medicine, National Yang Ming Chiao Tung University, Taipei, Taiwan, <sup>76</sup>Lung  
145 Cancer Center, Kyungpook National University Medical Center, Daegu, Republic of Korea,  
146 <sup>77</sup>Jeonnam Regional Cancer Center, Chonnam National University, Hwasun, Republic of Korea,  
147 <sup>78</sup>Department of Epidemiology, Shanghai Cancer Institute, Shanghai, China, <sup>79</sup>Department of  
148 Human Genetics, Genome Institute of Singapore, Singapore, Singapore, <sup>80</sup>School of Life  
149 Sciences, Anhui Medical University, Hefei, China, <sup>81</sup>Karmanos Cancer Institute, Wayne State  
150 University, Detroit, MI, USA, <sup>82</sup>Division of Genetics and Epidemiology, Institute of Cancer  
151 Research, London, UK, <sup>83</sup>Department of Medicine, Section of Epidemiology and Population  
152 Science, Institute for Clinical and Translational Research, Houston, TX, USA, <sup>84</sup>School of  
153 Medicine, Zhejiang University, Hangzhou, Zhejiang, China, <sup>85</sup>Department of Health Sciences  
154 Research, Mayo Clinic, Scottsdale, AZ, USA, <sup>86</sup>Department of Integrative Oncology, BC  
155 Cancer, Vancouver, BC, Canada, <sup>87</sup>Health Research Institute of Asturias (ISPA), Oviedo and  
156 Universidad Nebrija, Madrid, Spain, <sup>88</sup>Program in Epidemiology, Public Health Sciences  
157 Division, Fred Hutchinson Cancer Center, Seattle, Washington, USA, <sup>89</sup>Faculty of Health and  
158 Medical Sciences, University of Copenhagen, Copenhagen, Denmark, <sup>90</sup>Department of Clinical  
159 Biochemistry, Herlev and Gentofte Hospital, Copenhagen University Hospital, Copenhagen,  
160 Denmark, <sup>91</sup>International Agency for Research on Cancer (IARC/WHO), Lyon, France,  
161 <sup>92</sup>German Cancer Research Center (DKFZ), Heidelberg, Germany, <sup>93</sup>Translational Lung  
162 Research Center Heidelberg (TLRC-H), Member of the German Center for Lung Research  
163 (DZL), Heidelberg, Germany, <sup>94</sup>Department of Biosciences and Medical Biology and Center for  
164 Tumorbiology and Immunology (CTBI), University of Salzburg and Cancer Cluster Salzburg,  
165 Salzburg, Austria, <sup>95</sup>University Medical Center Goettingen, Goettingen, Germany, <sup>96</sup>Institute of  
166 Medical Informatics, Biometry and Epidemiology, Ludwig Maximilians University, Munich,  
167 Germany, <sup>97</sup>Helmholtz Center Munich, Institute of Epidemiology, Munich, Germany, <sup>98</sup>Institute  
168 of Medical Statistics and Epidemiology, Technical University Munich, Munich, Germany,  
169 <sup>99</sup>Harvard TH Chan School of Public Health, Boston, Massachusetts, USA, <sup>100</sup>Carmel Medical  
170 Center, Israel, <sup>101</sup>Markey Cancer Center, Lexington, KY, USA, <sup>102</sup>Liverpool University,  
171 Liverpool, UK, <sup>103</sup>The University of Texas MD Anderson Cancer Center, Houston, Texas, USA,  
172 <sup>104</sup>Epidemiology Program, University of Hawaii Cancer Center, Honolulu, HI, USA, <sup>105</sup>Princess  
173 Margaret Cancer Center, Toronto, ON, Canada, <sup>106</sup>Norris Cotton Cancer Center, Lebanon, NH,  
174 USA, <sup>107</sup>Radboud University Medical Center, Nijmegen, Netherlands, <sup>108</sup>National Institute of  
175 Occupational Health, Oslo, Norway, <sup>109</sup>Department of Medical Biosciences, Umeå University,  
176 Umeå, Sweden, <sup>110</sup>Department of Radiation Sciences, Umeå University, Umeå, Sweden,  
177 <sup>111</sup>University of Sheffield, Sheffield, UK, <sup>112</sup>UPMC Hillman Cancer Center and Department of  
178 Epidemiology, School of Public Health, University of Pittsburgh, Pittsburgh, PA, USA, <sup>113</sup>D,  
179 School of Pharmacy and Pharmaceutical Sciences, SUNY University at Buffalo, NY, USA,  
180 <sup>114</sup>Department of Cancer Epidemiology, H. Lee Moffitt Cancer Center and Research Institute,  
181 Tampa, FL, USA, <sup>115</sup>Department of Thoracic Surgery, Division of Epidemiology, Vanderbilt  
182 University Medical Center, Nashville, TN, USA, <sup>116</sup>Cancer Research Center, Kyungpook  
183 National University Medical Center, Daegu, Republic of Korea, <sup>117</sup>Department of Thoracic and



184 Cardiovascular Surgery, Cancer Research Institute, Seoul National University College of  
185 Medicine, Seoul, Republic of Korea, <sup>118</sup>Department of Occupational and Environmental Health  
186 and Ministry of Education Key Lab for Environment and Health, School of Public Health, Tongji  
187 Medical College, Huazhong University of Science and Technology, Wuhan, China, <sup>119</sup>Cancer  
188 Genomics Research Laboratory, Frederick National Laboratory for Cancer Research, Leidos  
189 Biomedical Research Inc, Rockville, MD, USA, <sup>120</sup>Division of Applied Oral Sciences &  
190 Community Dental Care, Faculty of Dentistry, The University of Hong Kong, Hong Kong,  
191 China, <sup>121</sup>State Key Laboratory of Pharmaceutical Biotechnology, The University of Hong Kong,  
192 Hong Kong, China Laboratory of Pharmaceutical Biotechnology, The University of Hong Kong,  
193 Hong Kong, China, <sup>122</sup>State Key Laboratory of Pharmaceutical Biotechnology, The University of  
194 Hong Kong, Hong Kong, China, <sup>123</sup>Department of Oncology, Cancer Center, Union Hospital,  
195 Huazhong University of Science and Technology, Wuhan, China, <sup>124</sup>The Ph.D. Program for  
196 Translational Medicine, College of Medical Science and Technology, Taipei Medical University,  
197 Taipei, Taiwan, <sup>125</sup>School of Public Health, Li Ka Shing (LKS) Faculty of Medicine, The  
198 University of Hong Kong, Hong Kong, China, <sup>126</sup>Key Laboratory of Cancer Etiology and  
199 Intervention, University of Liaoning Province, Shenyang, China, <sup>127</sup>Department of Internal  
200 Medicine, National Taiwan University Hospital Hsin-Chu Branch, Hsinchu, Taiwan,  
201 <sup>128</sup>Gleneagles Hong Kong Hospital, Hong Kong, China, <sup>129</sup>Department of Internal Medicine,  
202 Division of Medical Oncology, College of Medicine, Korea University Guro Hospital, Seoul,  
203 Republic of Korea, <sup>130</sup>Department of Internal Medicine, Seoul National University Bundang  
204 Hospital, Seongnam, Republic of Korea, <sup>131</sup>Department of Oncology, Wuhan Iron and Steel  
205 (Group) Corporation Staff-Worker Hospital, Wuhan, China, <sup>132</sup>Division of Pulmonary Oncology  
206 and Interventional Bronchoscopy, Department of Thoracic Medicine, Chang Gung Memorial  
207 Hospital, Taoyuan, Taiwan, <sup>133</sup>Division of Thoracic Surgery, Department of Surgery, Chung  
208 Shan Medical University Hospital, Taichung, Taiwan, <sup>134</sup>Division of Environmental  
209 Epidemiology, Institute for Risk Assessment Sciences (IRAS), Utrecht University, Utrecht, The  
210 Netherlands, <sup>135</sup>Department of Epidemiology and Biostatistics, University of California, San  
211 Francisco, San Francisco, CA, USA, <sup>136</sup>Department of Pathology, Queen Elizabeth Hospital,  
212 Hong Kong, China, <sup>137</sup>Qujing Center for Diseases Control and Prevention, Qujing, China,  
213 <sup>138</sup>Department of Oncology, Shandong Cancer Hospital and Institute, Shandong Academy of  
214 Medical Sciences, Jinan, China, <sup>139</sup>Division of Cohort Research, National Cancer Center Institute  
215 for Cancer Control, Tokyo, Japan, <sup>140</sup>Division of Epidemiology, National Cancer Center Institute  
216 for Cancer Control, Tokyo, Japan, <sup>141</sup>Center for Global Health, National Cancer Institute,  
217 Bethesda, MD, USA, <sup>142</sup>Institute of Medicine, Chung Shan Medical University, Taichung,  
218 Taiwan, <sup>143</sup>Genomic Research Center, Academia Sinica, Taipei, Taiwan, <sup>144</sup>Department of  
219 Internal Medicine, National Taiwan University Hospital, Taipei, Taiwan, <sup>145</sup>Laboratory Services,  
220 American Cancer Society, Georgia, USA, <sup>146</sup>Department of Oncology, School of Medicine,  
221 Johns Hopkins University, Baltimore, MD, USA, <sup>147</sup>Department of Biostatistics, Johns Hopkins  
222 Bloomberg School of Public Health, Baltimore, MD, USA, <sup>148</sup>Institute for Clinical and  
223 Translational Research, Baylor College of Medicine, Houston, TX, USA, <sup>149</sup>Section of  
224 Epidemiology and Population Sciences, Department of Medicine, Baylor College of Medicine,  
225 Houston, TX, USA, <sup>150</sup>Dan L Duncan Comprehensive Cancer Center, Baylor College of  
226 Medicine, Houston, TX, USA

227  
228 \* These authors contributed equally to this work

229 ‡ These authors jointly directed this work

230

231 Correspondence to: Batel Blechter ([batel.blechter@nih.gov](mailto:batel.blechter@nih.gov)), Qing Lan ([qingl@mail.nih.gov](mailto:qingl@mail.nih.gov)),

232 and Haoyu Zhang ([haoyu.zhang2@nih.gov](mailto:haoyu.zhang2@nih.gov))

233

234

235

236

237

238 **Abstract**

239

240 Polygenic risk scores (PRSs) are promising for risk stratification but have mainly been  
241 developed in European populations. This study developed single- and multi-ancestry PRSs for  
242 lung adenocarcinoma (LUAD) in East Asian (EAS) never-smokers using genome-wide  
243 association study summary statistics from EAS (8,002 cases; 20,782 controls) and European  
244 (2,058 cases; 5,575 controls) populations. A multi-ancestry PRS, developed using CT-SLEB,  
245 was strongly associated with LUAD risk (odds ratio=1.71, 95% confidence interval  
246 (CI):1.61,1.82), with an area under the receiver operating curve value of 0.640 (95%  
247 CI:0.629,0.653). Individuals in the highest 20% of the PRS had nearly four times the risk  
248 compared to the lowest 20%. Individuals in the 95<sup>th</sup> percentile of the PRS had an estimated  
249 6.69% lifetime absolute risk. Notably, this group reached the average population 10-year LUAD  
250 risk at age 50 (0.42%) by age 41. Our study underscores the potential of multi-ancestry PRS  
251 approaches to enhance LUAD risk stratification in EAS never-smokers.

252

253

254

255

256

257

258

259

260

261

262

263

264

265

266

267

268 **Key Words:** Polygenic risk scores, Lung adenocarcinoma, Genome-wide association studies,  
269 East Asian never smokers, Lifetime absolute risk

270

271 **Abbreviations:**

272 EAS, East Asian; LUAD, lung adenocarcinoma; GWAS, genome-wide association study; EUR,  
273 European; PRS, polygenic risk score; SNP, single nucleotide polymorphism; FLCCA, Female  
274 Lung Cancer Consortium in Asia; LD, linkage disequilibrium; AUC, area under the receiver  
275 operating curve; PC, principal component; OR, odds ratio; CI, confidence interval; USPSTF,  
276 United States Preventive Services Taskforce

277

278

279

280

281

282

283

284

285

286

287

288

289

290



291 **Introduction**

292

293 Lung cancer is a major global health challenge, responsible for about 20% of all cancer deaths in  
294 2020<sup>1</sup>. While smoking is the primary etiologic factor, around 25% of lung cancer cases occur in  
295 never-smokers, with significant geographical variations<sup>2</sup>. Notably, in East Asia (EAS), never-  
296 smoking women exhibit high incidences of lung adenocarcinoma (LUAD), the predominant  
297 histologic subtype<sup>3</sup>.

298

299 Beyond smoking, risk factors for LUAD include environmental and occupational exposures,  
300 lifestyle, family history, and genetic susceptibility<sup>4-7</sup>. Genome-wide association studies (GWAS)  
301 for never-smoking lung cancer across EAS and European (EUR) populations have identified 28  
302 susceptibility loci at 25 independent regions<sup>8-13</sup>. These GWAS findings enhance our  
303 understanding of LUAD's genetic architecture, yet the translation of these findings into clinical  
304 practice requires further investigation.

305

306 Polygenic risk scores (PRS) aggregate the effects of individual single nucleotide polymorphisms  
307 (SNPs) to estimate genetic risk for diseases, playing a crucial role in cancer prevention and  
308 screening. Previous efforts primarily utilized EUR populations for lung cancer PRS  
309 development<sup>14,15</sup> to better identify high-risk individuals. Nonetheless such PRSs often fall short  
310 for EAS never-smokers, reflecting a bias in screening guidelines and the focus of studies on  
311 populations with EUR ancestry. Despite ongoing efforts to integrate PRS into clinical practices  
312 for complex diseases, as seen in initiatives like the electronic Medical Records and Genomics  
313 (eMERGE) network<sup>16</sup>, Veterans Affairs Genomic Medicine at Veteran Affairs (GenoVA)  
314 study<sup>17</sup>, and the Women Informed to Screen Depending On Measures of risk (WISDOM)  
315 study<sup>18</sup>, lung cancer has been excluded. The predominant global burden of lung cancer, driven  
316 primarily by smoking, overlooks the significant impact and potential benefits of PRS in never-  
317 smoking populations.

318

319 The recent expansion of GWAS across diverse populations, combined with advancements in  
320 PRS methodology, underscores a pivotal shift towards enhancing disease outcome prediction  
321 beyond EUR populations<sup>19</sup>. Notably, the development of multi-ancestry PRS methods marks a

322 considerable advancement, leveraging data from various ancestral backgrounds to enrich the  
323 predictive accuracy and robustness of PRSs<sup>20–26</sup>. By jointly modeling genetic data from multiple  
324 populations, these approaches improve the predictive power of PRSs, thereby enhancing disease  
325 outcome predictions in non-EUR populations.

326  
327 While the development and validation of PRSs are critical, the application of an established PRS  
328 in estimating the absolute risk of a disease offers valuable insights into risk stratification,  
329 potentially guiding clinical interventions, such as lung cancer screening. Moreover, projecting  
330 necessary sample sizes for future studies to achieve varying levels of PRS predictive accuracy is  
331 an underexplored area that could significantly impact epidemiological research design and cost-  
332 effectiveness.

333  
334 This study aims to evaluate the predictive performance of single- and multi-ancestry PRSs for  
335 LUAD in never-smoking EAS individuals using state-of-the-art methodologies. By integrating  
336 multiple datasets, we constructed PRSs based on summary statistics for 5,622 never-smoking  
337 cases and 21,813 never-smoking controls from EAS and EUR ancestries. We assessed the  
338 performance of the PRSs using independent, individual level data of 4,438 never-smoking EAS  
339 cases and 4,544 never-smoking EAS controls. Furthermore, we estimated the lifetime and 10-  
340 year absolute risks of LUAD using the most accurate PRSs developed. Lastly, we projected the  
341 sample sizes needed in future research to achieve specific levels of prediction accuracy with  
342 PRSs in EAS never-smokers (**Figure 1**).

343  
344

345 **Methods**

346

347 *Study design and data sources*

348

349 Training data compilation: study population and genotyping

350 The studies, genotyping protocols, and quality control for PRS construction are previously  
351 described in detail<sup>27</sup>. Briefly, EAS single-ancestry PRSs for LUAD were constructed using  
352 summary data from 3,564 never-smoking LUAD cases and 16,238 never-smoking controls of  
353 EAS ancestry from the Nanjing Lung Cancer Study (NJLCS)<sup>9,28</sup>, National Cancer Center of  
354 JAPAN (NCC), and the Research Institute and Aichi Cancer Center (ACC). The NJLCS study  
355 combined data from several cities, genotyped by Affymetrix Genome-Wide Human SNP Array  
356 6.0, as well as the Oncoarray GWAS<sup>28-30</sup>. The NCC study included lung cancer patients and  
357 control data from multiple Japanese, with genotyping conducted on Illumina  
358 HumanOmniExpress and HumanOmni1-Quad genotyping platforms. Similarly, the ACC study  
359 pooled data from the multiple Japanese medical institutions, and the Nagahama Study, with  
360 genotyping performed using Illumina 610k and Illumina660k platforms. To construct the multi-  
361 ancestry PRS, we further incorporated GWAS summary statistics from 2,058 never-smoking  
362 LUAD cases and 5,575 never-smoking controls of EUR ancestry, genotyped using Illumina  
363 Infinium OmniExpress-24 v1.2 BeadChips and Illumina Human660W-Quad BeadChip<sup>13</sup>.

364

365 Tuning and validation: study population and genotyping

366 For PRS tuning and validation, we used 4,438 never-smoking LUAD cases and 4,544 never-  
367 smoking controls from the Female Lung Cancer Consortium in Asia (FLCCA)<sup>10,11</sup>, an  
368 international consortium composed of never-smoking EAS women from regions including  
369 Mainland China, Singapore, Taiwan, Hong Kong, South Korea and Japan<sup>10,11</sup>. All samples were  
370 genotyped using the Illumina 660W, 370K or 610Q microarrays. The FLCCA data were  
371 randomly and equally divided for tuning (2,219 cases, 2,272 controls) and validation (2,219  
372 cases, 2,272 controls). Informed consent was obtained from all participants, and the recruitment  
373 and data collection procedures were approved by the local ethics review committees of all  
374 participating research institutes.

375

376 *Construction of PRS*

377

378 Single-ancestry PRS methods

379 **PRS-25:** We constructed a simple PRS using the 25 independent SNPs (PRS-25) that reached  
380 genome-wide significance (i.e.,  $P < 5 \times 10^{-8}$ ) in the largest GWAS for LUAD in EAS population to  
381 date<sup>8</sup>. The PRS-25 was calculated by summing the risk alleles weighed by their effect sizes (i.e.,  
382 per allele log-odds ratio) obtained from a meta-analysis including only never-smokers.

383

384 **PRS-CT:** We generated a PRS using the CT method<sup>31</sup> using PLINK 1.90<sup>32</sup>. This involved the  
385 clumping of SNPs based on linkage disequilibrium (LD) with a threshold of  $r^2 = 0.1$  within a  
386 500kb window. The LD were estimated from half of the FLCCA dataset used for tuning dataset.  
387 We created nine SNP subsets by applying incremental P-value thresholds (i.e.,  $P < 5 \times 10^{-8}$ ,  
388  $P < 5 \times 10^{-7}$ , ...,  $P < 5 \times 10^{-1}$ , 1), and calculated their respective PRSs using PLINK2<sup>32</sup> command "--  
389 score cols+=scoresums,-scoreavgs no-mean-imputation". Using the tuning dataset, the AUC was  
390 calculated for each threshold to identify the most predictive P-value cutoff.

391

392 **LDpred2-PRS:** We applied the LDpred2 method, implemented in the R package bigsnpr<sup>33</sup>,  
393 using a Bayesian framework to estimate SNP effect sizes through a shrinkage estimator. This  
394 method leverages GWAS summary statistics, incorporating a prior for effect sizes, while also  
395 accounting for LD across SNPs. Our analysis was constrained to HapMap3 variants, and we  
396 calibrated the model using a range of hyperparameters: the proportion of causal SNPs was set  
397 across a 21-point logarithmic sequence from  $10^{-5}$  to 1, and the per-SNP heritability was set as a  
398 fraction (0.3, 0.7, 1 or 1.4) of the total heritability estimated by LD score regression<sup>34</sup> divided by  
399 the number of causal SNPs. Lastly, we used the "sparse" option to set weaker effects to zero. The  
400 optimal tuning parameters were selected based on the highest AUC achieved on the tuning  
401 dataset.

402

403 **PRS-EUR 128:** We evaluated the performance of a European-derived PRS (PRS-EUR 128)<sup>35</sup>,  
404 which consists of 128 variants obtained from a GWAS of predominately active smokers, on EAS  
405 populations to assess its cross-population applicability.

406

407 Multi-ancestry PRSs methods:

408 **LDpred2 PRS + PRS-EUR 128:** For the multi-ancestry PRSs, we applied the weighted-PRS  
409 approach by linearly combining the most predictive single-ancestry PRS from the EAS  
410 population (Ldpred2 PRS) with the EUR population-specific PRS (PRS-EUR 128). The weights  
411 of this combined PRS were calculated by applying a logistic regression on the tuning dataset in R  
412 version 4.2.0.

413  
414 **PRS-CSx:** We applied PRS-CSx, a multi-ancestry polygenic prediction method that uses a  
415 Bayesian framework with a continuous shrinkage prior to estimate SNP effect sizes from GWAS  
416 summary statistics across different populations<sup>26</sup>. LD reference panels for EUR and EAS,  
417 provided by the PRS-CSx software, were constructed from the 1000 Genomes Project (1KG)  
418 samples<sup>36</sup>. We used the default setting with the gamma-gamma prior hyperparameters (a and b)  
419 at 1 and 0.5, respectively. The shrinkage parameter  $\phi$  was assessed at  $10^{-6}$ ,  $10^{-4}$ ,  $10^{-2}$ , and 1  
420 within the tuning dataset to select the value with highest AUC. With the optimal  $\phi$ , we  
421 calculated the PRS using posterior effect-sizes from both EAS and EUR populations. Weights  
422 were then estimated to linearly combine the two PRSs on the tuning dataset. The final  
423 performance was then evaluated on an EAS independent validation dataset.

424  
425 **CT-SLEB:** We used the recently developed CT-SLEB method to derive a PRS using EAS and  
426 EUR datasets<sup>24</sup>. This method extends the standard CT method by designing a two-dimensional  
427 approach to select SNPs for EAS PRS construction. It incorporates an empirical Bayesian (EB)  
428 framework to model genetic correlations between EAS and EUR. Following this, a super-  
429 learning (SL) model is then applied to integrate multiple PRSs, each generated using distinct p-  
430 value thresholds and clumping parameters<sup>37</sup>. Our implementation of CT-SLEB followed the  
431 default setting with p-value thresholds  $p_t = 5 \times 10^{-8}, 5 \times 10^{-7}, \dots, 5 \times 10^{-1}$ , or 1, and genetic  
432 distances  $d = 50/r^2$  or  $100/r^2$ , where  $r^2 = 0.01, 0.05, 0.1, 0.2, 0.5$  or 0.8. The clumping  
433 process for EAS was based on the LD reference derived from the FLCCA tuning dataset, and the  
434 EUR LD reference was based on the 1KG EUR samples.

435

436 *Relative and absolute risk calculation for PRSs*

437



438 To evaluate each PRS's performance, we standardized the scores to a unit standard deviation,  
439 based on the distribution among the control group in the EAS validation dataset. We then  
440 quantified the association between the standardized PRSs and LUAD risk using the OR and 95%  
441 CI, via logistic regression, adjusting for age and the first 10 principal components (PCs). We  
442 evaluated the predictive performance of the different PRS models through the adjusted AUC  
443 values, accounting for age and top 10 PCs, using the R package RISCA<sup>37</sup>. We further estimated  
444 the ORs of each PRS for risk of LUAD based on PRS percentiles, setting the middle quantile  
445 (40-60%) as the reference category. Lastly, we used the likelihood ratio test to evaluate the  
446 interaction between the PRS and age (<40, 40-49, 50-59, 60-69, ≥70).

447  
448 For absolute risk estimates, we used the iCARE software<sup>38</sup> to calculate the cumulative lifetime  
449 (age 30-80) and 10-year absolute risks of LUAD among never-smoking female controls in  
450 FLCCA (N=4,544). Absolute risks were derived by applying the Cox proportional hazard model  
451 with the top performing PRS (CT-SLEB) and age-specific lung cancer incidence and mortality  
452 rates in Taiwan<sup>39</sup>. We estimated the absolute risk of LUAD overall, as well as stratified by first-  
453 degree family history of lung cancer.

454  
455 *Projections of CT and LDpred2 PRS performance by sample size*

456  
457 We used GENESIS package<sup>40</sup> to estimate the sample sizes needed for PRS to reach various  
458 AUC levels in the EAS population. This method estimates the expected number of SNP  
459 discoveries and their explained heritability in future studies. Using the GWAS summary statistics  
460 from our EAS training dataset, and the provided LD scores for EAS populations from the 1KG  
461 dataset, we projected the AUC for CT PRS across various case-control ratios, from 1:1 to 1:10,  
462 and case numbers ranging from 5,000 to 200,000. Given GENESIS's specific design for CT PRS,  
463 we developed a extend its application to LDpred2 PRS projections. This involved modeling the  
464 relationship between effective sample sizes with the phenotypic variance ratio between LDpred2  
465 and CT PRS (**Supplementary Figure 1**), elaborated in the **Supplementary Note**.

466  
467 **Results**

468

469 *Development and validation of the PRS*

470

471 We applied several cutting-edge single- and multi-ancestry PRS methods (**Methods,**  
472 **Supplementary Figure 2**), evaluating their performance in terms of relative risk and AUC  
473 within the EAS validation dataset (**Methods, Table 1, Supplementary Figure 2-3**). Among  
474 single-ancestry PRS methods, the LDpred2 PRS, incorporating 942,591 SNPs, outperformed  
475 other methods, with an odds ratio (OR) per unit standard deviation (SD) of 1.62 (95% confidence  
476 interval (CI): 1.52, 1.73) alongside an adjusted AUC of 0.629 (95% CI: 0.618, 0.641). In  
477 contrast, the PRS designed exclusively for EUR populations underperformed in our EAS  
478 population, with an estimated adjusted AUC of 0.489 (95% CI: 0.477, 0.501), possibly attributed  
479 to the inclusion of smokers in the development of the existing EUR PRS.

480

481 Among multi-ancestry PRS methods, the weighted-PRS of EAS and EUR yielded an OR per unit  
482 SD of 1.62 (95% CI: 1.52, 1.72), with PRS-CSx and CT-SLEB showing even stronger  
483 association with ORs of 1.67 (95% CI: 1.57, 1.78) and 1.71 (95% CI: 1.61, 1.82), respectively.  
484 Among all the PRS methods, CT-SLEB had the highest AUC of 0.640 (95% CI: 0.629, 0.653).  
485 Setting individuals in the middle PRS quantile (40<sup>th</sup> to 60<sup>th</sup> percentile) as the reference category,  
486 those in the highest 5% of risk for the top performing PRS, CT-SLEB, had 4.17 (95% CI: 3.20,  
487 5.47)-fold risk, whereas those in the lowest 5% had 0.33 (95% CI: 0.21, 0.51)-fold risk of  
488 developing LUAD (**Figure 2**).

489

490 *Interaction between CT-SLEB PRS and age*

491

492 We observed a significant multiplicative interaction between the CT-SLEB PRS and age at  
493 diagnosis for LUAD risk (p-interaction = 0.002). As illustrated in **Figure 3**, the OR per SD of  
494 PRS was higher in younger individuals, particularly those under 40 years of age (OR=1.70, 95%  
495 CI: 1.42, 2.05) compared to individuals aged 70 and older (OR=1.53, 95% CI: 1.37, 1.72). The  
496 association followed a roughly linear pattern across middle-age categories, peaking between ages  
497 60-69 (OR = 1.93, 95% CI: 1.79-2.08). This pattern suggests a stronger impact of genetic risk  
498 factors in younger age groups. A similar trend was observed when analyzing the association  
499 between LUAD risk and a dichotomized PRS (upper 90<sup>th</sup> percentile) by age categories.

500

501 *Absolute risk of developing lung adenocarcinoma by CT-SLEB PRS*

502

503 Using the iCARE package<sup>41</sup>, we estimated the absolute risk of LUAD for never-smoking EAS  
504 women, utilizing the CT-SLEB PRS which demonstrated the highest AUC (**Table 1**). The  
505 cumulative lifetime risk of LUAD, assessed between age 30-80, varied markedly across PRS  
506 percentiles, ranging from a minimal mean of 0.78% in the 5th percentile to a substantial mean of  
507 6.69% in the 95th percentile (**Figure 4**). Additionally, the 10-year absolute risk for LUAD in  
508 never-smoking 50-year-old women, varied from a mean of 0.13% in the 5th percentile to mean  
509 of 1.11% in the 95th percentile of the PRS distribution. While the average 10-year absolute risk  
510 for this age group is 0.42%, never-smoking women in the >95 and 90-95<sup>th</sup> percentiles PRS  
511 reached this risk earlier, at age of 41 and 42, respectively.

512

513 To evaluate the combined effect of PRS and family history, we further modeled the absolute risk  
514 for LUAD in individuals with (n=86) and without (n=1,414) family history of lung cancer in a  
515 first-degree relative (**Figure 5, Supplementary Figure 4**). We observed that those with family  
516 history of lung cancer have higher absolute lifetime risk of LUAD than those without family  
517 history. The lifetime absolute risk between age 30-80 for women at the bottom 5<sup>th</sup> and top 95<sup>th</sup>  
518 percentile of the PRS with family history of lung cancer were 2.77% and 9.39%, respectively  
519 (Supplementary Figure 4). Additionally, the 10-year absolute risk for women in the 95<sup>th</sup> PRS  
520 percentile with a family history reached the population average 10-year absolute risk at age 50  
521 (0.42%) much earlier, at age 38. Formal tests for interaction between PRS and family history  
522 were not statistically significant (p=0.45), suggesting that family history and PRS independently  
523 contribute to LUAD risk stratification.

524

525 *Projections of polygenic risk score performance by sample size*

526

527 Using the GENESIS model, we projected the expected AUC of PRS-CT and LDpred2 PRS  
528 under varying GWAS sample sizes and case-control ratios for LUAD in never smoking EAS  
529 women (**Figure 6**). Our analysis, using the EAS training dataset, estimated approximately 1,772  
530 (s.e.=1,641) susceptibility variants that are independently associated with LUAD<sup>27</sup>. This high

531 number of variants underscores the extensive polygenic nature of LUAD, implying relatively  
532 small effect sizes for individual SNPs. Based on our current data, the expected AUC for the  
533 LDpred2 PRS stands at 0.631 (95% CI: 0.618, 0.641), aligning closely with the actual  
534 performance of the LDpred2 PRS in the validation dataset. The upper boundary of our  
535 predictions, based solely on PRS, suggests an AUC potential of up to 0.731 (95% CI:  
536 0.640,0.786). As sample sizes increase in our projections, the AUC is estimated to rise to 0.673  
537 (95% CI: 0.593–0.725) with 55,000 EAS LUAD cases and a 1:1 case-control ratio. With the  
538 same number of cases but a 1:10 case-control ratio, the AUC is projected to further increase to  
539 0.698 (95% CI: 0.621–0.727), nearing the theoretical upper limit of predictive accuracy.

540  
541

#### 542 *Explaining genetic variance through PRS across different sample sizes*

543

544 We also evaluated the genetic variance explained by the PRS under different sample sizes given  
545 the projected results (**Supplementary Note, Table 2**). The current LDpred2 PRS explained  
546 26.6% of the genome-wide chip heritability, contributing to approximately 16.5% of the 1.84-  
547 fold familial relative risk for lung cancer among EAS never-smokers. Concurrently, genome-  
548 wide chip variants heritability explained 61.9% of the 1.84-fold familial relative risk associated  
549 with the disease. With an expanded sample size of 35,000 cases and 350,000 controls, the  
550 constructed PRS is projected to account for 57.9% of the genome-wide chip variants heritability,  
551 and 35.8% of the 1.84-fold familial relative risk for the disease.

552

## 553 **Discussion**

554

555 We developed and validated single- and multi-ancestry PRSs for LUAD in never-smoking EAS  
556 individuals using the largest GWAS dataset of never-smokers to date. The multi-ancestry PRS  
557 method, CT-SLEB, integrating summary data from EAS and EUR never-smokers, emerged as  
558 the best-performing PRS. It exhibited a dose-response relationship with LUAD risk and achieved  
559 higher AUC than all other evaluated PRSs. Further, our analysis demonstrates the potential of  
560 PRS in stratifying individuals' 10-year and lifetime risk of developing LUAD. Lastly, we

561 projected the expected discriminatory accuracy of the PRS across a range of sample sizes and  
562 case-control ratios.

563  
564 To date, GWAS and subsequent PRS models have largely centered on EUR populations<sup>42,43</sup>,  
565 rendering them less precise when applied to non-EUR populations and risking the exacerbation  
566 of health disparities<sup>44,45</sup>. Consistent with prior research<sup>15</sup>, our study observed that a lung cancer  
567 PRS constructed using EUR data, which included both smokers and never-smokers, significantly  
568 underperformed when applied to EAS never-smoking individuals (AUC = 0.489, 95% CI:  
569 (0.477, 0.501)), further highlighting the heterogeneity of the disease across populations and the  
570 need to expand risk assessment efforts to non-EUR populations. Notably, by utilizing novel  
571 methods to integrate GWAS data from both EUR and EAS populations, we demonstrated that a  
572 multi-ancestry PRS enhances the precision of risk stratification for LUAD among EAS never-  
573 smokers.

574  
575 Large-scale efforts to integrate PRS into clinical practice have focused on conditions with well-  
576 established PRS prediction performance<sup>16-18</sup>, such as Type 2 Diabetes, breast cancer, and  
577 cardiovascular diseases. Lung cancer has been notably absent from these efforts, primarily due to  
578 the focus on smoking as a risk factor. This has limited the exploration and application of PRS in  
579 lung cancer risk stratification, particularly among never-smokers. Recent efforts, such as the  
580 TALENT study in Taiwan<sup>46</sup>, have evaluated low-dose computed tomography (LDCT) screening  
581 for never-smokers with traditional risk factors like family history, passive smoking exposure, and  
582 chronic lung diseases. However, a PRS has not yet been integrated into these screening  
583 protocols. Further, a recent study in Taiwan incorporating genetic susceptibility in a risk model  
584 with lifestyle and environmental risk factors observed an improvement in the AUC from 0.697 to  
585 0.714<sup>39</sup>. Notably, the study found that even by incorporating only 11 susceptibility loci, the  
586 model's discriminative power had improved. Our study demonstrates the potential of a genome-  
587 wide PRS to complement these efforts, enhancing risk stratification and identifying high-risk  
588 individuals at younger ages, who may benefit from earlier interventions.

589  
590 We address this gap by presenting a PRS that signifies a 3.92-fold increase in lung cancer risk  
591 for individuals in the top 20% risk quantile, a marked improvement over the 2.09-fold increase



592 observed in a prior study by Wei et al.<sup>47</sup> for a cohort of Chinese never-smoking women. Further,  
593 we identified a significant interaction between the PRS and age, observing heterogeneity in  
594 effects of PRS across age categories. Similar to findings in a study on prostate cancer<sup>48</sup>, we  
595 observed higher associations between the PRS and LUAD among younger individuals compared  
596 to those diagnosed at a later age. While the pattern was not strictly linear, and competing risks of  
597 mortality may influence these results, our findings suggest that the relative impact of genetic  
598 susceptibility may decrease as non-genetic risk factors accumulate with age. This highlights the  
599 potential utility of PRS in younger populations, where genetic risk may play a more pronounced  
600 role in disease onset.

601  
602 We estimated the lifetime and 10-year absolute risk of LUAD using the PRS, which can be used  
603 in risk stratification efforts and to identify those who are at high risk for the disease.  
604 Specifically, we found that the 10-year absolute risk for LUAD in a never-smoking 50-year-old  
605 woman, a critical age for initiating recommended annual lung cancer screening as per the United  
606 States Preventive Services Taskforce (USPSTF)<sup>49</sup>, varied from 0.13% in the 5th percentile to  
607 1.11% in the 95th percentile of the PRS distribution. Notably, women in the highest risk  
608 categories (>95th and 90-95th percentiles) reached the average 10-year absolute risk (0.42%)  
609 much earlier, at ages 41 and 42, respectively. This finding suggests that the PRS has the potential  
610 to identify younger women who may benefit from earlier risk-based interventions. While limited  
611 in sample size, we also found that the lifetime absolute risk of LUAD was even higher among  
612 women in the top percentile of the PRS and with first-degree family history of lung cancer,  
613 suggesting the two risk factors may act independently for their effect on LUAD risk. Although  
614 the absolute risk values are modest, the PRS's ability to stratify women into higher-risk  
615 categories at younger ages suggests potential utility in guiding early screening decisions. Early  
616 identification through PRS could be particularly valuable for never-smoking individuals, who are  
617 traditionally excluded from lung cancer screening programs.

618  
619 The CT-SLEB method's improved performance can be attributed to its ability to utilize diverse  
620 genotyping arrays, thereby including population-specific variants. This aspect, along with the  
621 inclusion of EUR samples in the training set, broadens the genetic diversity and leverages larger  
622 sample sizes for improved model accuracy. Moreover, CT-SLEB excels in modeling genetic

623 correlations across ancestries, efficiently using both shared and unique genetic markers for  
624 refined disease risk estimations across populations. Lastly, we set up our study with a robust  
625 three-sample split design, dividing datasets into training, tuning, and validation. This ensures that  
626 PRS efficacy is validated independently, effectively reducing the overfitting risk.

627  
628 Current PRS studies predominantly focus on evaluating relative and absolute risks<sup>8,12,15,47,50</sup>, yet  
629 our research introduces a crucial forecast of sample sizes required for differing levels of PRS  
630 accuracy. Our projection analyses indicated that achieving an AUC of 0.70 would approach the  
631 maximized prediction potential of the PRS, given the estimated genetic variance explained by  
632 GWAS chip variants. To reach this level of accuracy, a future study would need to include  
633 55,000 cases with a 1:10 case-control ratio. Notably, accessing large biobanks with publicly  
634 available controls could reduce the number of required cases<sup>51</sup>.-These projections offer a  
635 strategic framework for planning and designing future genetic studies on lung cancer,  
636 establishing clear benchmarks for PRS model performance, which is essential for the scientific  
637 community in advancing genetic risk prediction.

638  
639 Our study has several limitations. First, it focuses on the genetic susceptibility of LUAD without  
640 considering additional questionnaire-based risk factors. However, to be able to utilize data from  
641 the largest GWAS conducted to date, this work aimed primarily to identify the most effective  
642 PRS model within genetic contexts that can then be used in future efforts. Further, we plan to  
643 conduct integrative analyses that merge PRS with other risk indicators to refine LUAD risk  
644 predictions for never-smokers. Second, our projections are tailored to single-ancestry PRS  
645 models, not fully addressing the intricacies of multi-ancestry approaches, including diverse  
646 sample sizes and genetic correlations across populations. Third, our validation cohort, derived  
647 from the FLCCA and covering various EAS regions, relied on Taiwanese incidence data for  
648 absolute risk estimations. Consequently, our absolute risk findings may not extend universally to  
649 all EAS never-smokers, though our PRS performance assessment and sample size projections  
650 remain applicable to our population of interest. Lastly, the clinical application of our PRS  
651 findings, particularly in screening and risk counseling, is still in preliminary stages. Despite  
652 advancements in using PRS for smoking cessation trials<sup>52</sup>, its implementation for never-smokers  
653 in clinical settings has been limited, presenting a significant area for future research.

654

655 In summary, our study evaluates various PRS models to capture the genetic predisposition to  
656 LUAD among never-smoking EAS individuals. It extends beyond risk prediction by estimating  
657 both 10-year and cumulative lifetime absolute risks, and by projecting the sample sizes required  
658 for future GWAS to refine the predictive power of PRSs in future GWAS. Additionally, we  
659 quantify the phenotypic variance captured by PRSs across different sample sizes. Future studies  
660 are crucial to further improve these PRS models, aiming to enhance genetic risk predictions  
661 while integrating a wider array of risk factors. Such efforts will develop more accurate and  
662 comprehensive risk models for LUAD in never-smoking individuals across diverse populations.

663

664

665

666

667 **Acknowledgements**

668 This work utilized the computational resources of the high-performance computation Biowulf  
669 cluster at National Institutes of Health, USA (<http://hpc.nih.gov>).

670 Female Lung Cancer Consortium in Asia (NCI): This study was supported by a Grant-in-Aid for  
671 Scientific Research on Priority Areas from the Ministry of Education, Science, Sports, Culture  
672 and Technology of Japan, a Grant-in- Aid for the Third Term Comprehensive 10-Year Strategy  
673 for Cancer Control from the Ministry Health, Labor and Welfare of Japan, by Health and Labor  
674 Sciences Research Grants for Research on Applying Health Technology from the Ministry of  
675 Health, Labor and Welfare of Japan, by the National Cancer Center Research and Development  
676 Fund, the National Research Foundation of Korea (NRF) grant funded by the Korea government  
677 (MEST) (grant No. 2011-0016106), a grant of the National Project for Personalized Genomic  
678 Medicine, Ministry for Health & Welfare, Republic of Korea (A111218-11-GM04), the Program  
679 for Changjiang Scholars and Innovative Research Team in University in China (IRT\_14R40 to  
680 K.C.), the National Science & Technology Pillar Program (2011BAI09B00), MOE 111 Project  
681 (B13016), the National Natural Science Foundation of China (No. 30772531, and 81272618),  
682 Guangdong Provincial Key Laboratory of Lung Cancer Translational Medicine (No.  
683 2012A061400006), Special Fund for Research in the Public Interest from the National Health  
684 and Family Planning Commission of PRC (No. 201402031), and the Ministry of Science and  
685 Technology, Taiwan (MOST 103-2325-B-400-023 & 104-2325-B-400-012). The Japan Lung  
686 Cancer Study (JLCS) was supported in part by the Practical Research for Innovative Cancer  
687 Control from Japan Agency for Medical Research and Development (15ck0106096h0002) and  
688 the Management Expenses Grants from the Government to the National Cancer Center (26-A-1)  
689 for Biobank. BioBank Japan was supported by the Ministry of Education, Culture, Sports,  
690 Sciences and Technology of the Japanese government. The Japan Public Health Center-based  
691 prospective Study (the JPHC Study) was supported by the National Cancer Center Research and  
692 Development Fund (23-A- 31[toku], 26-A-2, 29-A-4, 2020-J-4, and 2023-J-4) (since 2011) and a  
693 Grant-in-Aid for Cancer Research from the Ministry of Health, Labour and Welfare of Japan  
694 (from 1989 to 2010). The Taiwan GELAC Study (Genetic Epidemiological Study for Lung  
695 AdenoCarcinoma) was supported by grants from the National Research Program on Genomic  
696 Medicine in Taiwan (DOH99-TD-G-111-028), the National Research Program for  
697 Biopharmaceuticals in Taiwan (MOHW 103-TDUPB-211-144003, MOST 103-2325-B-400-023)

698 and the Bioinformatics Core Facility for Translational Medicine and Biotechnology  
699 Development (MOST 104-2319-B-400-002). This work was also supported by the Jinan Science  
700 Research Project Foundation (201102051), the National Key Scientific and Technological  
701 Project (2011ZX09307-001-04), the National Natural Science Foundation of China  
702 (No.81272293), the State Key Program of National Natural Science of China (81230067), the  
703 National Research Foundation of Korea (NRF) grant funded by the Korea government (MSIP)  
704 (No. NRF- 2014R1A2A2A05003665), Sookmyung Women’s University Research Grants, Korea  
705 (1-1603-2048), Agency for Science, Technology and Research (A\*STAR), Singapore and the  
706 US National Institute of Health Grant (1U19CA148127-01). The overall GWAS project was  
707 supported by the intramural program of the US National Institutes of Health/National Cancer  
708 Institute. The following is a list of grants by study center: SKLCS (Y.T.K.)—National Research  
709 Foundation of Korea (NRF) grant funded by the Korea government (MEST) (2011-0016106).  
710 (J.C.) – This work was supported by a grant from the National R&D Program for Cancer  
711 Control, Ministry of Health & Welfare, Republic of Korea (grant no. 0720550-2). (J.S.S) – grant  
712 number is A010250. WLCS (T.W.)—National Key Basic Research and Development Program  
713 (2011CB503800). SLCS (B.Z.)—National Nature Science Foundation of China (81102194).  
714 Liaoning Provincial Department of Education (LS2010168). China Medical Board (00726). GDS  
715 (Y.L.W.)—Foundation of Guangdong Science and Technology Department (2006B60101010,  
716 2007A032000002, 2011A030400010). Guangzhou Science and Information Technology Bureau  
717 (2011Y2-00014). Chinese Lung Cancer Research Foundation, National Natural Science  
718 Foundation of China (81101549). Natural Science Foundation of Guangdong Province  
719 (S2011010000792). TLCS (K.C., B.Q.)—Program for Changjiang Scholars and Innovative  
720 Research Team in University (PCSIRT), China (IRT1076). Tianjin Cancer Institute and Hospital.  
721 National Foundation for Cancer Research (US). FLCS (J.C.W., D.R., L.J.)—Ministry of Health  
722 (201002007). Ministry of Science and Technology (2011BAI09B00). National S&T Major  
723 Special Project (2011ZX09102-010-01). China National High-Tech Research and Development  
724 Program (2012AA02A517, 2012AA02A518). National Science Foundation of China  
725 (30890034). National Basic Research Program (2012CB944600). Scientific and Technological  
726 Support Plans from Jiangsu Province (BE2010715). NLCS (H.S.)—China National High-Tech  
727 Research and Development Program Grant (2009AA022705). Priority Academic Program  
728 Development of Jiangsu Higher Education Institution. National Key Basic Research Program



729 Grant (2011CB503805). GEL-S (A.S.)—National Medical Research Council Singapore grant  
730 (NMRC/0897/2004, NMRC/1075/2006). (J.Liu)—Agency for Science, Technology and  
731 Research (A\*STAR) of Singapore. GELAC (C.A.H.)—National Research Program on Genomic  
732 Medicine in Taiwan (DOH98-TDG-111-015). National Research Program for  
733 Biopharmaceuticals in Taiwan (DOH 100- TD-PB-111-TM013). National Science Council,  
734 Taiwan (NSC 100- 2319-B-400-001). YLCS (Q.L.)—Supported by the intramural pro- gram of  
735 U.S. National Institutes of Health, National Cancer Institute. SWHS (W.Z., W-H.C., N.R.)—The  
736 work was supported by a grant from the National Institutes of Health (R37 CA70867, UM1  
737 CA182910) and the National Cancer Institute intramural research program, including NCI  
738 Intramural Research Program contract (N02 CP1101066). JLCS (K.M., T.K.)—Grants-in-Aid  
739 from the Ministry of Health, Labor, and Welfare for Research on Applying Health Technology  
740 and for the 3rd-term Comprehensive 10-year Strategy for Cancer Control; by the National  
741 Cancer Center Research and Development Fund; by Grant-in-Aid for Scientific Research on  
742 Priority Areas and on Innovative Area from the Ministry of Education, Science, Sports, Culture  
743 and — Technology of Japan. (W.P.)—NCI R01-CA121210. HKS (J.W.)— General Research  
744 Fund of Research Grant Council, Hong Kong (781511M). The Environment and Genetics in  
745 Lung Cancer Etiology (EAGLE), Prostate, Lung, Colon, Ovary Screening Trial (PLCO), and  
746 Alpha-Tocopherol, Beta-Carotene Cancer Prevention (ATBC) studies were supported by the  
747 Intramural Research Program of the National Institutes of Health, National Cancer Institute  
748 (NCI), Division of Cancer Epidemiology and Genetics. ATBC was also supported by U.S. Public  
749 Health Service contracts (N01-CN-45165, N01-RC-45035, and N01-RC-37004) from the NCI.  
750 PLCO was also supported by individual contracts from the NCI to the University of Colorado  
751 Denver (NO1-CN-25514), Georgetown University (NO1-CN-25522), the Pacific Health  
752 Research Institute (NO1-CN-25515), the Henry Ford Health System (NO1-CN-25512), the  
753 University of Minnesota, (NO1-CN- 25513), Washington University (NO1-CN-25516), the  
754 University of Pittsburgh (NO1-CN-25511), the University of Utah (NO1-CN- 25524), the  
755 Marshfield Clinic Research Foundation (NO1-CN- 25518), the University of Alabama at  
756 Birmingham (NO1-CN- 75022), Westat, Inc. (NO1-CN-25476), and the University of California,  
757 Los Angeles (NO1-CN-25404). The Carotene and Retinol Efficacy Trial (CARET) is funded by  
758 the National Cancer Institute, National Institutes of Health through grants U01-CA063673,  
759 UM1-CA167462, and U01-CA167462. The Cancer Prevention Study-II (CPS-II) Nutrition

760 Cohort was supported by the American Cancer Society. The NIH Genes, Environment and  
761 Health Initiative (GEI) partly funded DNA extraction and statis- tical analyses (HG-06-033-NCI-  
762 01 and RO1HL091172-01), genotyping at the Johns Hopkins University Center for Inherited  
763 Disease Research. This research was supported by the National Research Foundation of Korea  
764 (NRF) grant funded by the Korea government (MSIT) (No. 2020R1A2C4002236)

765

766

767 Female Lung Cancer Consortium in Asia (Tianjin): Tianjin Science and Technology Committee  
768 Foundation, 18YFZCSY00520.

769

770 Female Lung Cancer Consortium in Asia (Taiwan): The Ministry of Health and Welfare grants  
771 DOH97-TD-G-111-028 (ISC), DOH98-TD-G-111-017 (ISC), DOH99-TD-G-111-014 (ISC);  
772 DOH97-TD-G-111-026 (CAH), DOH98-TD-G-111-015 (CAH), DOH99-TD-G-111-028  
773 (CAH); National Health Research Institutes grants NHRI-PH-110-GP-01, NHRI-PH-110-GP-03;  
774 and the Ministry of Science and Technology grants MOST108-2314-B-400-038(CAH),  
775 MOST109-2740-B-400-002(CAH), MOST 111-2740-B-400-002 (CAH), MOST 111-2314-B-  
776 400-020 (CAH).

777

778 The GWAS of lung cancer in European never smokers was supported by NIH R01 CA149462  
779 (OYG).

780

781 OncoArray study in Europeans: The OncoArray data and analysis from INTEGRAL-ILCCO  
782 were supported by NIH U19 CA203654, and U19 CA148127. The data harmonization for  
783 ILCCO was supported by Canadian Institute for Health Research (CIHR) Canada Research Chair  
784 to R.J.H, and CIHR FDN 167273).

785

786 European never-smoking lung cancer study: CIA is a Research Scholar of the Cancer Prevention  
787 Institute of Texas (CPRIT) and supported by CPRIT grant RR170048.

788

789 Taiwan eQTL study: This study was supported by the Ministry of Health and Welfare grants  
790 DOH97-TD-G-111-028 (ISC), DOH98-TD-G-111-017 (ISC), DOH99-TD-G-111-014 (ISC);

791 DOH97-TD-G-111-026 (CAH), DOH98-TD-G-111-015 (CAH), DOH99-TD-G-111-028  
792 (CAH); National Health Research Institutes grants NHRI-PH-110-GP-01, NHRI-PH-110-GP-03;  
793 and the Ministry of Science and Technology grants MOST108-2314-B-400-038(CAH),  
794 MOST109-2740-B-400-002(CAH).

795 B.B., K.W., J.C., J.S. N.R., Q.L. and H.Z. are supported by NIH intramural Research Program.  
796 N.C. is supported by NIH grant 1R01HG010480. P.Y. is supported by Mayo Clinic Foundation  
797 Research Funds, NIH-CA77118 and CA80127. G.L. is supported is supported by the Alan  
798 Brown Chair and Lusi Wong Fund of the Princess Margaret Cancer Foundation. D.C.C is  
799 supported by U01CA209414. O.Y.G. is supported by NIH R01 CA231141.

800

801

## 802 **Author contributions**

803 B.B., N.R., Q.L. and H.Z. organized and designed the study. B.B., K.W., H.Z. carried out the  
804 statistical analyses. B.B., K.W., Q.L. N.R. and H.Z. wrote the first draft. Q.L., M.T.L., B.A.B.,  
805 W.H., N.E.C., BT.J., M.Song, H.P., D.A., C.C.C., L.B., M.Y., A.H., B.H., J.Liu, B.Zhu, S.I.B.,  
806 C.K., K.Wyatt, S.A.L., A.Chao, J.F.F.J., S.J.C., N.R., Z.Wang, C.L., J.C., C.W., W.T., D.Lin,  
807 S.J.A., X.C.Z., J.S., Y.L.W., M.P.W., L.P.C., J.C.M.H., V.H.F.L., Z.H., K.M., J.Y.P., Jia.Liu,  
808 H.S.J., J.E.C., Y.Y.C., H.N.K., M.H.S., S.S.K., Y.C.K., I.J.O., S.W.S., H.I.Y., Y.T.K., Y.C.H.,  
809 J.H.K., Y.H.K., J.S.S., Y.J.J., K.H.P., C.H.K., J.S.K., I.K.P., B.S., Jie.L, Z.W., S.C., J.Y.,  
810 J.C.W., Y.Y., Y.B.X., Y.T.G., D.L., J.Y.Y.W., H.C., L.J., J.Z., G.J., K.F., Z.Y., B.Z., W.W.,  
811 P.G., Q.H., X.L., Y.R., A.S., Y.L., Y.C., W.Y.L., W.Z., X.O.S., Q.C., G.Y., B.Q., T.W., H.G.,  
812 L.L., P.X., F.W., G.W., J.X., J.L., R.CH.V., B.B., H.D.III.H., J.Wang, A.D.L.S., J.K.C.C.,  
813 V.L.S., K.C., H.Z., H.D., C.A.H., T.Y.C., L.H.C., IS.C., C.Y.C., S.S.J., CH.C., GC.C., CF.H.,  
814 Y.H.T., W.C.W., K.Y.C., M.S.H., W.C.S., Y.M.C., C.L.W., K.C.C., C.J.Y., H.H.H., F.Y.T., H.C.L.,  
815 C.J.C., P.C.Y., K.Shiraishi, T.K., H.K., S.M., H.H., K.Goto, Y.Ohe, S.W., Y.Yatabe, M.T.,  
816 R.Hamamoto, A.Takahashi, Y.Momozawa, M.Kubo, Y.K., Y.D., Y.Miyagi, H.N., T.Y., N.S.,  
817 M.I., M.H., Y.N., K.Takeuchi, K.W., K.Matsuda, Y.Murakami, K.S., K.T., Y.O., M.S.,  
818 H.Suzuki, A.G., Y.M., T.H., M.K., K.O., H.S., J.D., H.M., M.Z., R.J.H., S.L., A.T., C.C., S.E.B.,  
819 M.Johansson, A.R., H.Bö., H.E.W., D.C., G.R., S.A., P.B., J.M.K., J.K.F., S.S.S., L.L.M., O.M.,  
820 H.Bö., G.L., A.A., L.A.K., S.ZN., K.G., M.J., A.C., J.M.Y., P.L., M.B.S., M.C.A., C.I.A.,  
821 A.G.S., R.H., M.R.S., O.Y.G., I.P.G., X.W., P.Y. conducted epidemiology studies and

822 contributed samples to GWAS and/or conducted initial genotyping. All authors reviewed and  
823 approved the final review of the manuscript.

824

825 **Competing interests**

826 The authors declare no competing interests.

827

828

829

830

831

832

833

834

835

836

837

838

839

840

841

842 **Table 1. Prediction performance of different methods for generating polygenic risk scores**  
 843 **for lung cancer in never-smoking East Asian populations.**

| Model type                                | Number of SNPs      | OR (95% CI) <sup>1</sup> | AUC (95% CI) <sup>2</sup> |
|-------------------------------------------|---------------------|--------------------------|---------------------------|
| <b>Single-ancestry method<sup>3</sup></b> |                     |                          |                           |
| <b>PRS-25<sup>4</sup></b>                 | 25 (24 available)   | 1.53 (1.44, 1.63)        | 0.621 (0.612, 0.637)      |
| <b>PRS-CT</b>                             | 8                   | 1.37 (1.29, 1.46)        | 0.591 (0.585, 0.609)      |
| <b>LDpred2 PRS</b>                        | 942,591             | 1.62 (1.52, 1.73)        | 0.629 (0.618, 0.641)      |
| <b>PRS-EUR 128<sup>5</sup></b>            | 128 (109 available) | 0.97 (0.91, 1.03)        | 0.489 (0.477, 0.501)      |
| <b>Multi-ancestry method<sup>6</sup></b>  |                     |                          |                           |
| <b>LDpred2 PRS + PRS-EUR 128</b>          | 942,700             | 1.62 (1.52, 1.72)        | 0.629 (0.617, 0.640)      |
| <b>PRS-CSx</b>                            | 969,720             | 1.67 (1.57, 1.78)        | 0.637 (0.625, 0.647)      |
| <b>CT-SLEB</b>                            | 2,127,229           | 1.71 (1.61, 1.82)        | 0.640 (0.629, 0.653)      |

844 Abbreviations: SNP, single nucleotide polymorphism; OR, odds ratio; CI, confidence interval; AUC, area  
 845 under the curve; PC, principal component; CT, clumping and thresholding

846 <sup>1</sup>ORs are provided per one unit standard deviation of PRS.

847 <sup>2</sup>Adjusted for age (continuous) and first 10 principal components.

848 <sup>3</sup>Sample size for single-ancestry PRS methods included 3,564 cases and 16,238 controls of East Asian  
 849 (EAS) ancestry for training, 2,219 cases and 2,272 controls of EAS ancestry for tuning and 2,219 cases  
 850 and 2,272 controls of EAS ancestry for validation.

851 <sup>4</sup>SNPs that reached genome-wide significance in Shi et al., 2023.

852 <sup>5</sup>SNPs obtained from genome-wide association study conducted in individuals with European ancestry  
 853 (Hung et al., 2021, Cancer Res.).

854 <sup>6</sup>Sample size for multi-ancestry PRS methods included 3,564 cases and 16,238 controls of East Asian  
 855 (EAS) ancestry, as well as 2,058 cases and 5,575 controls of European ancestry for training, 2,219 cases  
 856 and 2,272 controls of EAS ancestry for tuning and 2,219 cases and 2,272 controls of EAS ancestry for  
 857 validation.

858

859 **Table 2. Genetic variance in East Asian lung cancer among never smokers explained by**  
 860 **LDpred2 PRS**

| Sample size <sup>1</sup> | Genetic variance of PRS <sup>2</sup> | Proportion of all-GWAS variants genetic variance explained by PRS <sup>3</sup> | Proportion of Familial risk explained by PRS <sup>4</sup> |
|--------------------------|--------------------------------------|--------------------------------------------------------------------------------|-----------------------------------------------------------|
| <b>Current</b>           | 0.201                                | 26.6%                                                                          | 16.5%                                                     |
| <b>35,000 cases</b>      | 0.437                                | 57.9%                                                                          | 35.8%                                                     |
| <b>55,000 cases</b>      | 0.540                                | 71.5%                                                                          | 44.3%                                                     |

861 <sup>1</sup> *Sample Size*: The current sample comprises 3,564 cases and 16,238 controls. Future projections assume  
 862 a 1:10 case-control ratio for sample sizes of 35,000 and 55,000 cases. Genetic variance projections for the  
 863 LDpred2 PRS are based on the GENESIS method, originally designed for the CT method (refer to Nat.  
 864 Genet. 50, 1318-1326 (2018)), extended to include LDpred2 by modeling the variance ratio between  
 865 LDpred2 and CT (**Supplementary Note**).

866 <sup>2</sup> *Genetic Variance of PRS*: This corresponds to the heritability on the frailty scale, assuming a polygenic  
 867 log-additive model underpins this relationship. It quantifies the proportion of the phenotype variation that  
 868 can be attributed to genetic factors in the context of PRS.

869 <sup>3</sup> *Proportion of Genetic Variance from All-GWAS Variants Explained by PRS*: This represents the  
 870 variance of all genome-wide imputable variants as established through LD-score regression (refer to Nat.  
 871 Genet. 47, 291-5 (2015) and Nat. Genet. 47, 1236-41 (2015)). On the frailty scale, the genetic variance of  
 872 all GWAS variants is calculated as  $\sigma_{GWAS}^2 = Var(\sum_{m=1}^M \beta_m G_m)$ , where  $G_m$  is the standardized genotype  
 873 for the mth SNP,  $\beta_m$  is the true log odds ratio for the mth SNP and M is the total number of causal SNPs  
 874 among the GWAS variants. For East Asian never smokers, the estimated genetic variance of all GWAS  
 875 variants is 0.755.

876 <sup>4</sup> *Proportion of Familial Risk Explained by PRS*: This calculates the familial risk in terms of genetic  
 877 variance using the formula  $\lambda_s^2 = \exp(\sigma^2)$ , where  $\lambda_s$  is the familial risk when a first-order sibling has the  
 878 disease, and  $\sigma^2$  is the genetic variance on frailty-scale. Further details of this calculation can be found in  
 879 Nat. Genet. 31, 33-36 (2002). For lung cancer in East Asian never-smokers, the familial risk is a 1.84-fold  
 880 increase, and the genetic variance of all GWAS variants, as estimated through LD-score regression,  
 881 explains 61.9% of this increased familial relative risk.

882



883

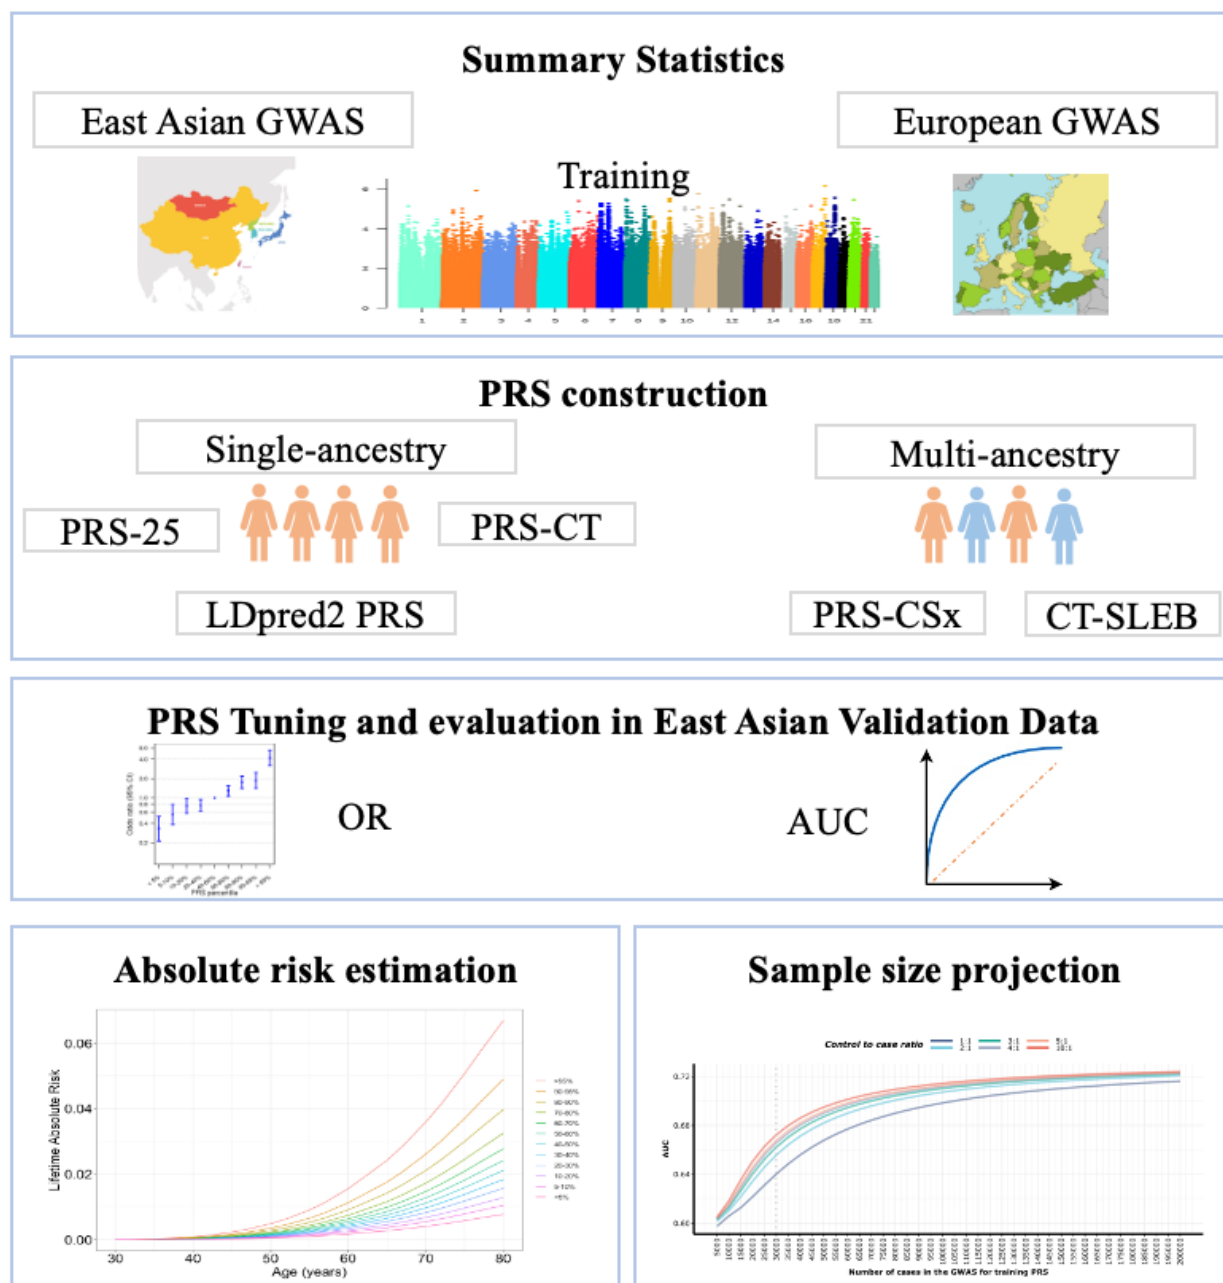

884

885 **Figure 1. Overview of data structure, polygenic risk score (PRS) development, validation**  
 886 **and application.** Summary statistics from East Asian (EAS) genome-wide association studies  
 887 (GWAS) were used to develop single-ancestry PRS using methods such as a simple PRS  
 888 constructed using 25 SNPs that have previously reached genome-wide significance (i.e.,  $P < 5 \times 10^{-8}$ )  
 889 (PRS-25), a PRS using the clumping and thresholding (CT) method (PRS-CT) incorporating 8  
 890 SNPs, and a PRS using a genome-wide Bayesian-based approach, LDpred2 (LDpred2 PRS)

891 incorporating close to a million SNPs. For the multi-ancestry PRS development, we also used  
892 summary statistics from European (EUR) GWAS, applying the PRS-CSx method that leveraged  
893 genome-wide association summary statistics for close to a million SNPs with a Bayesian  
894 continuous shrinkage prior to model SNP effect sizes across populations, as well as CT-SLEB  
895 method, which enhances the standard CT methods with a two-dimensional approach to select  
896 SNPs for EAS PRS construction by incorporating over 2 million SNPs. Tuning and validation of  
897 each PRS was conducted in an independent EAS individual-level data. Relative risk per PRS  
898 quantile was calculated as an odds ratio (OR) with the middle quantile (40<sup>th</sup> to 60<sup>th</sup> percentile) set  
899 as the reference, and the area under the receiver operating curve (AUC) was estimated for each  
900 PRS. CT-SLEB PRS was used to estimate 10-year and lifetime cumulative absolute risk, and  
901 PRS-CT and PRS-LDpred2 were used for sample size projection.

902  
903  
904  
905  
906  
907  
908  
909  
910  
911  
912  
913  
914  
915  
916  
917  
918  
919

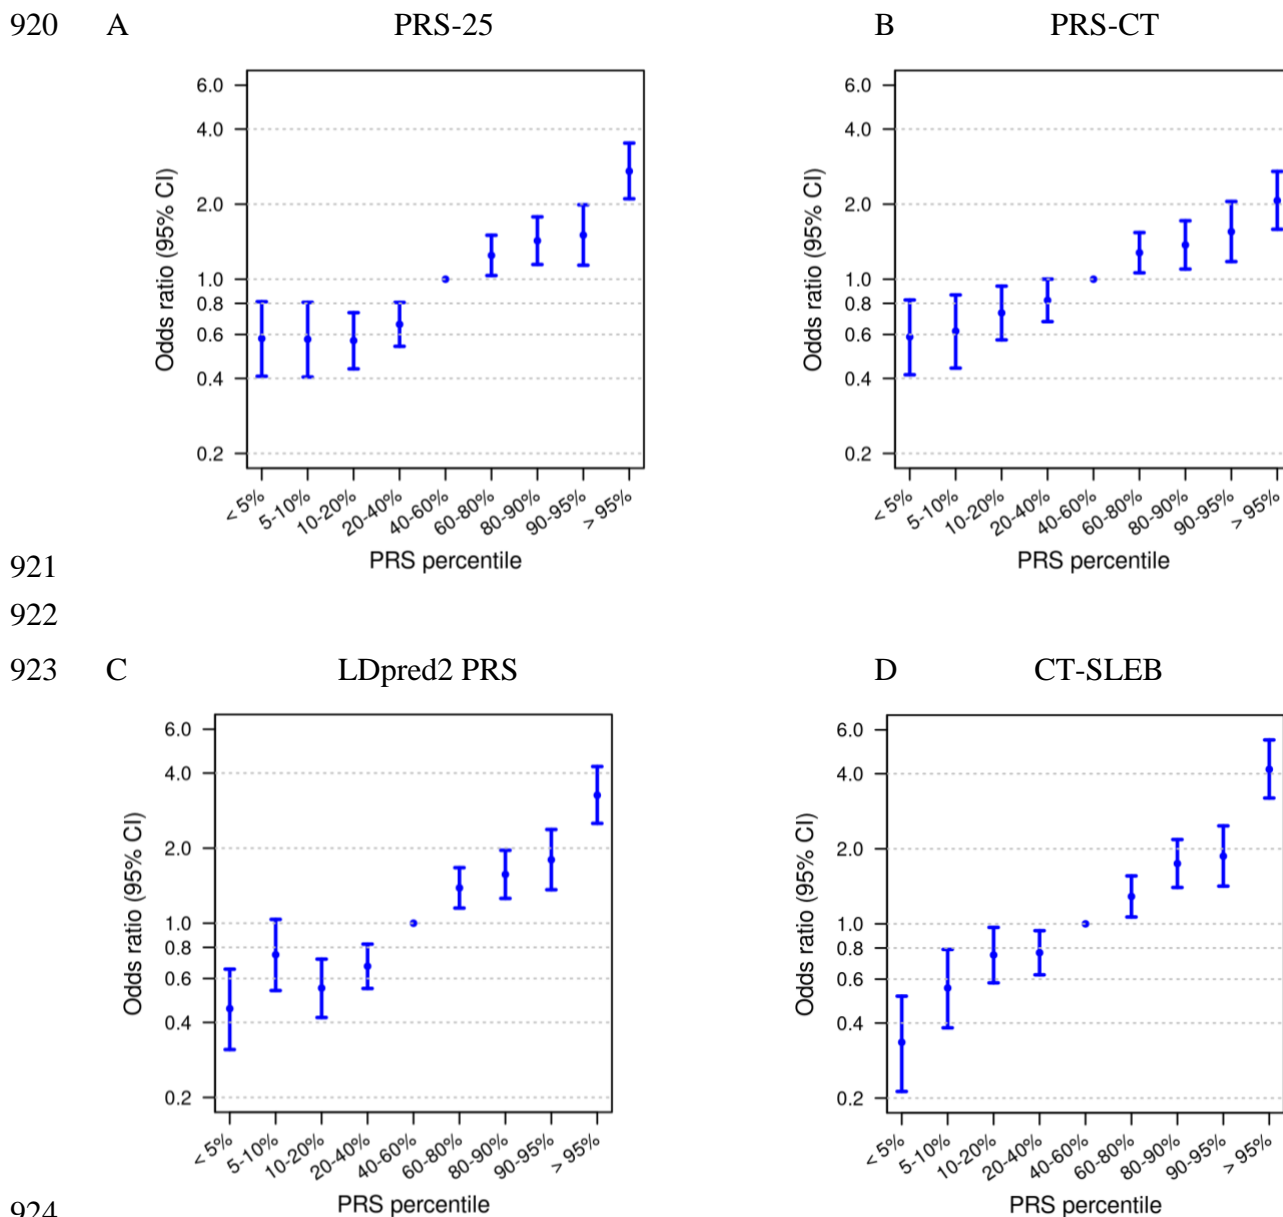

927 **Figure 2. Relative risk estimated for quantiles of each polygenic risk score (PRS) and lung**  
928 **adenocarcinoma in the validation dataset of women with East Asian ancestry, treating the**  
929 **40<sup>th</sup> to 60<sup>th</sup> percentile as the references.** Odds ratios of PRS per standard deviation (SD) and  
930 95% confidence intervals are shown for (A) the single-ancestry 25 SNP polygenic risk score,  
931 PRS-25 (A), (B) Clumping and thresholding method, PRS-CT, (C) Bayesian-based genome-wide  
932 approach, LDpred2 PRS, and (D) multi-ancestry approach, CT-SLEB.

933

934 A

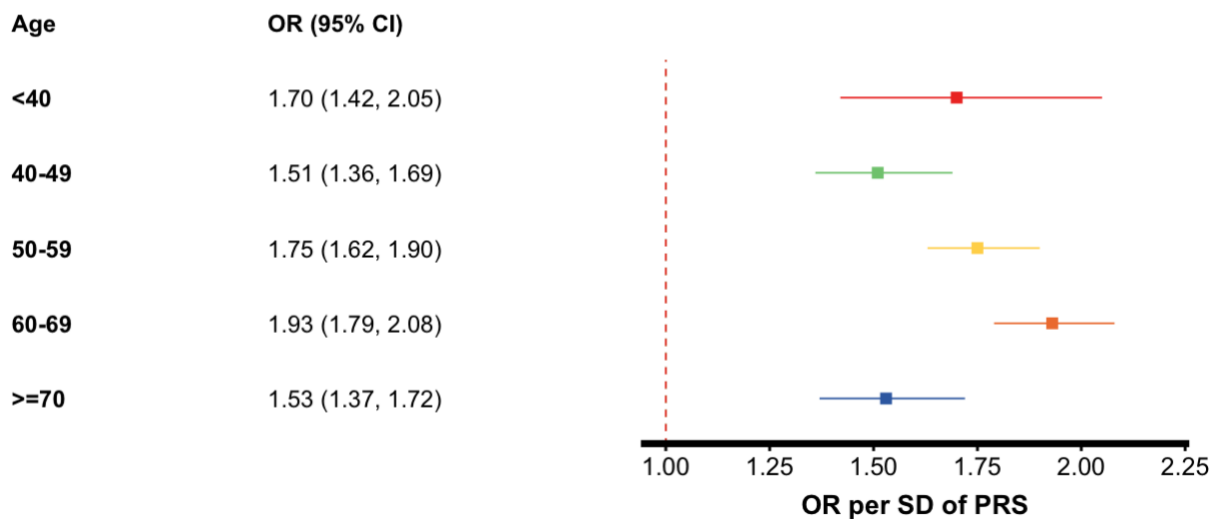

935

936 B

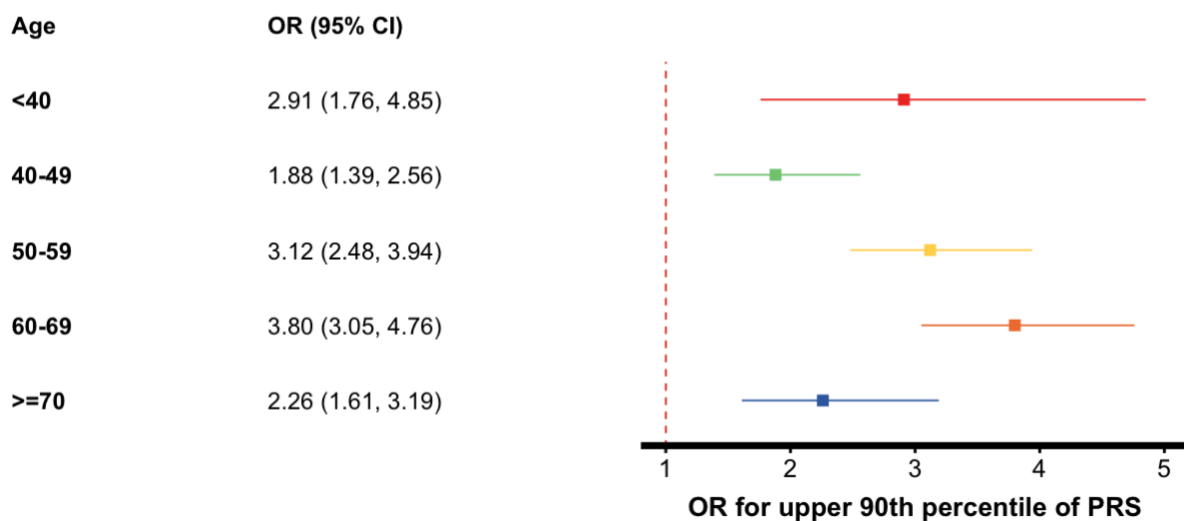

937

938

939 **Figure 3. Association between polygenic risk score (PRS) and lung adenocarcinoma by age**  
940 **groups.** (A) Odds ratios (ORs) per standard deviation (SD) of the PRS and 95% confidence  
941 intervals, and (B) ORs for individuals in the upper 90th percentile of the PRS.

A

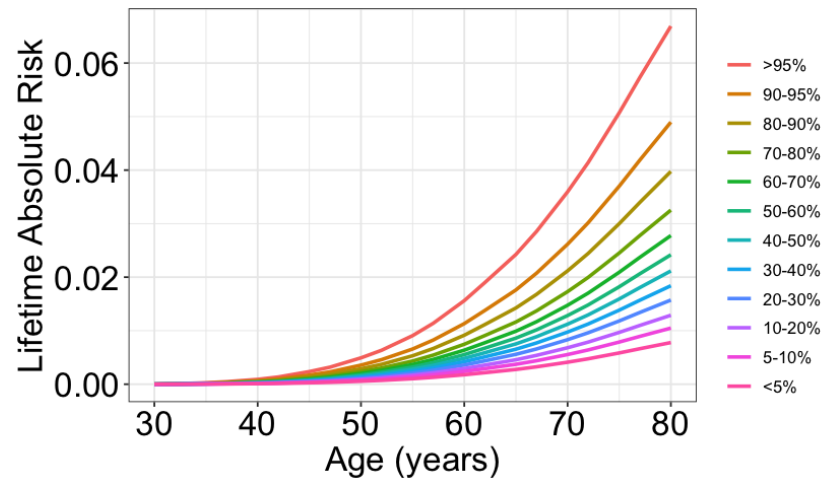

B

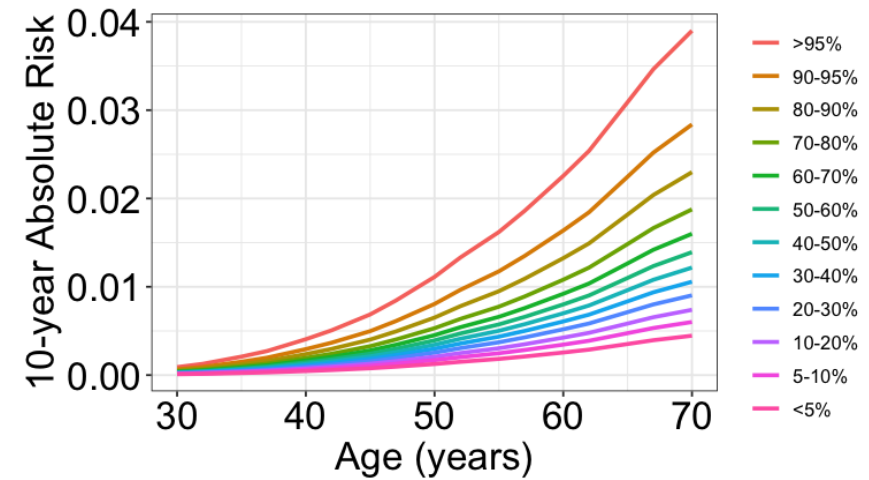

**Figure 4. Lifetime cumulative and 10-year absolute risk of developing lung adenocarcinoma.** (A) Lifetime (age 30-80) cumulative risk and (B) 10-year absolute risk of developing lung adenocarcinoma in never-smoking women in East Asia by percentiles of the CT-SLEB polygenic risk score (PRS). Absolute risks were calculated using the iCARE package<sup>38</sup>, based on Taiwan's age-specific incidence and mortality data, and the PRS relative risks, as described in the Methods section.

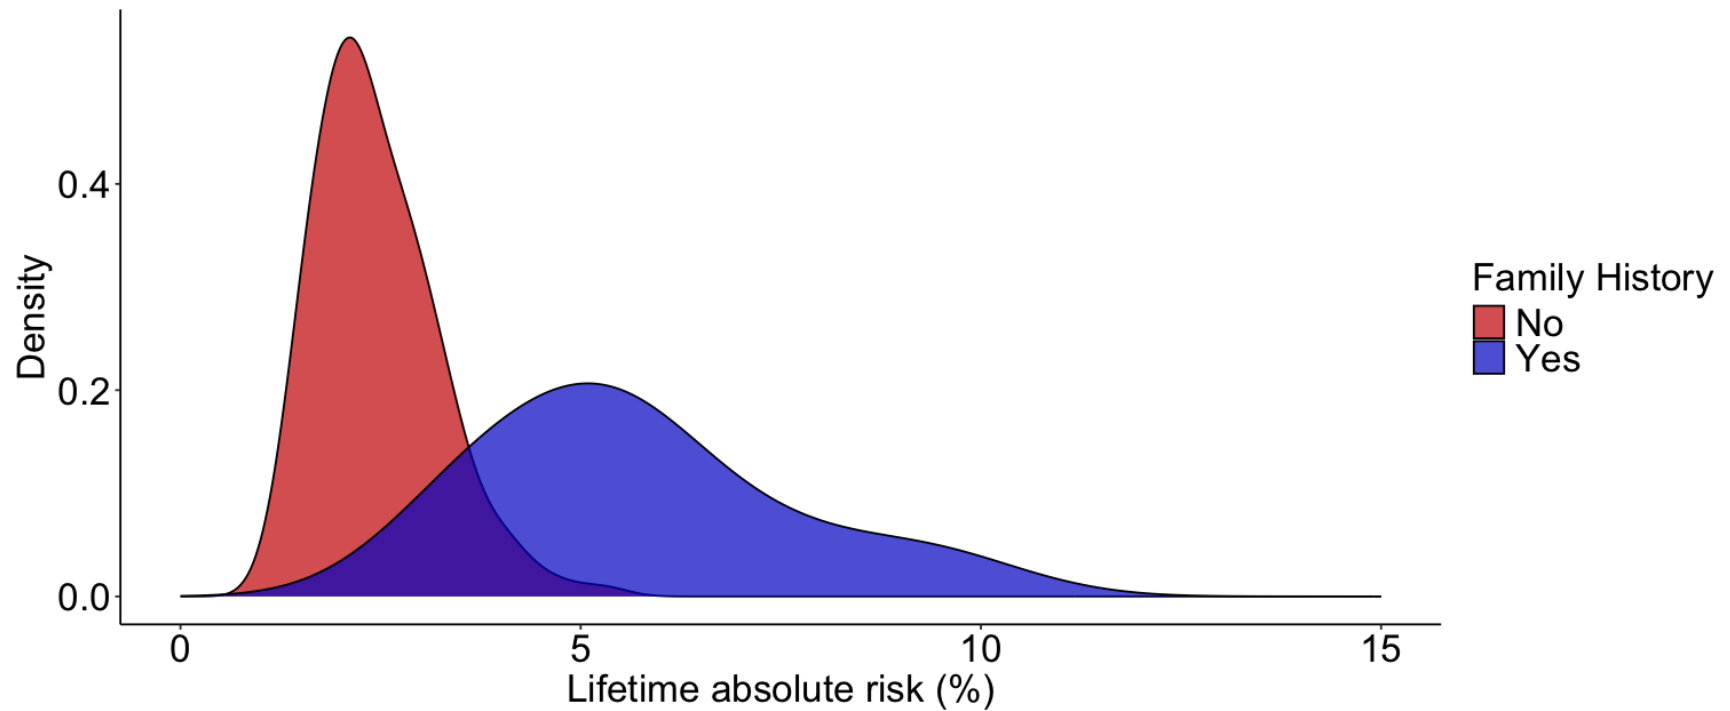

**Figure 5. Lifetime cumulative absolute risk of developing lung adenocarcinoma by family history.** Lifetime (age 30-80) absolute risk of developing lung adenocarcinoma in never-smoking East Asian women stratified by first-degree family history of lung cancer. Absolute risks were calculated using iCARE package<sup>38</sup>, based on Taiwan's age specific incidence and mortality data, and the relative risks of the PRS and family history, as described in the Methods section.



A

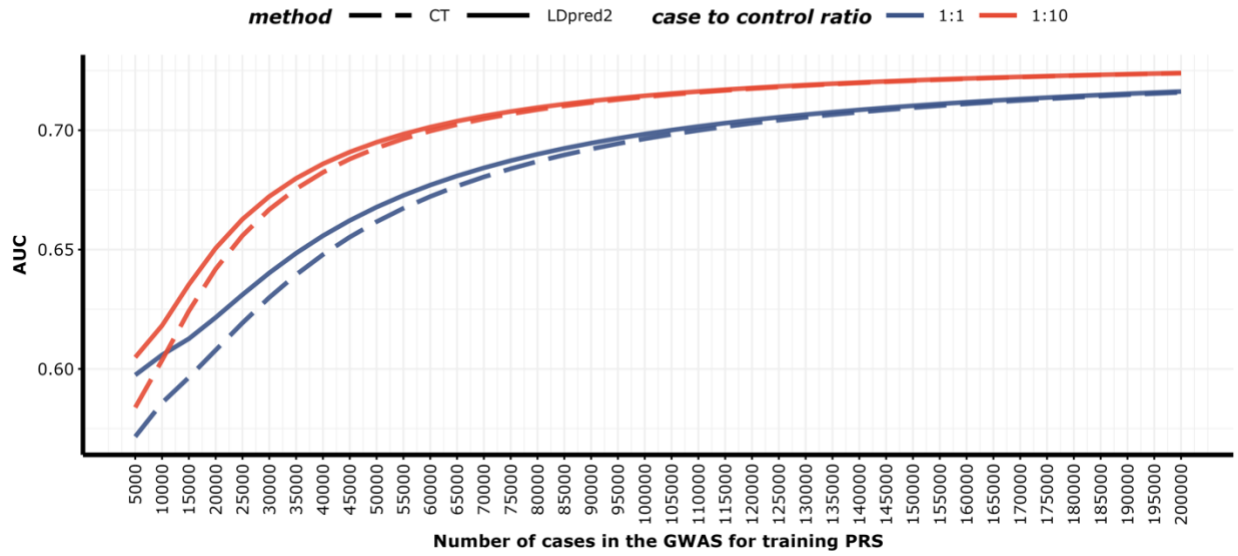

B

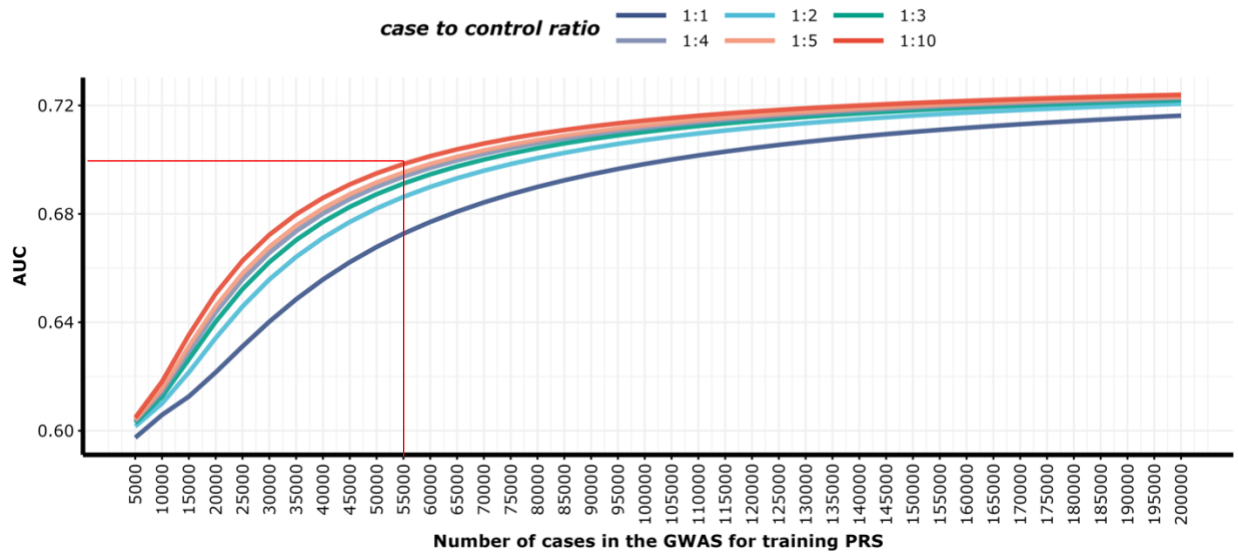

**Figure 6. Projected area under the receiver operating characteristic curve (AUC) of polygenic risk scores (PRS) built using genome-wide association studies (GWAS) with varying sample sizes for lung adenocarcinoma in never-smoking East Asian women. (A)**

AUC values for PRS-CT and LDpred2 PRS with case-to-control ratios of 1:1 and 1:10. (B) AUC values for LDpred2 PRS across case-to-control ratios of 1:1, 1:2, 1:3, 1:4, 1:5, and 1:10.

## References

1. Bray, F. *et al.* Global cancer statistics 2018: GLOBOCAN estimates of incidence and mortality worldwide for 36 cancers in 185 countries. *CA. Cancer J. Clin.* **68**, 394–424 (2018).
2. Sun, S., Schiller, J. H. & Gazdar, A. F. Lung cancer in never smokers--a different disease. *Nat. Rev. Cancer* **7**, 778–790 (2007).
3. Cheng, T. Y. D. *et al.* The International Epidemiology of Lung Cancer: Latest Trends, Disparities, and Tumor Characteristics. *J. Thorac. Oncol.* **11**, 1653–1671 (2016).
4. Byun, J. *et al.* ‘Cross-ancestry genome-wide meta-analysis of 61,047 cases and 947,237 controls identifies new susceptibility loci contributing to lung cancer’. *Nat Genet* **54**, 1167 (2022).
5. Landi, M. T. *et al.* Tracing lung cancer risk factors through mutational signatures in never-smokers. *Am. J. Epidemiol.* **190**, 962–976 (2021).
6. Corrales, L. *et al.* Lung cancer in never smokers: The role of different risk factors other than tobacco smoking. *Crit. Rev. Onco. Hematol.* **148**, (2020).
7. Sisti, J. & Boffetta, P. What proportion of lung cancer in never-smokers can be attributed to known risk factors? *Int. J. Cancer* **131**, 265–275 (2012).
8. Shi, J. *et al.* Genome-wide association study of lung adenocarcinoma in East Asia and comparison with a European population. *Nature Commun.* **14**, (2023).
9. Dai, J. *et al.* Identification of risk loci and a polygenic risk score for lung cancer: a large-scale prospective cohort study in Chinese populations. *Lancet. Respir. Med.* **7**, 881–891 (2019).
10. Seow, W. J. *et al.* Association between GWAS-identified lung adenocarcinoma susceptibility loci and EGFR mutations in never-smoking Asian women, and comparison with findings from Western populations. *Hum. Mol. Genet.* **26**, 454–465 (2017).
11. Lan, Q. *et al.* Genome-wide association analysis identifies new lung cancer susceptibility loci in never-smoking women in Asia. *Nat. Genet.* **44**, 1330–1335 (2012).
12. Li, Y. *et al.* Genetic variants and risk of lung cancer in never smokers: a genome-wide association study. *Lancet Oncol.* **11**, 321–330 (2010).
13. Hung, R. J. *et al.* Lung cancer risk in never-smokers of European descent is associated with genetic variation in the 5p15.33 TERT-CLPTM1L1 region. *J. Thorac Oncol.* **14**, 1360–1369 (2019).
14. Lebrecht, M. B. *et al.* Validation of lung cancer polygenic risk scores in a high-risk case-control cohort. *Genet. Med.* **25**, (2023).
15. Hung, R. J. *et al.* Assessing Lung Cancer Absolute Risk Trajectory Based on a Polygenic Risk Model. *Cancer Res.* **81**, 1607–1615 (2021).
16. Linder, J. E. *et al.* Returning integrated genomic risk and clinical recommendations: The eMERGE study. *Genet. Med.* **25**, (2023).
17. Hao, L. *et al.* Development of a clinical polygenic risk score assay and reporting workflow. *Nat. Med.* **28**, 1006–1013 (2022).
18. Shieh, Y. *et al.* Breast Cancer Screening in the Precision Medicine Era: Risk-Based Screening in a Population-Based Trial. *J. Natl. Cancer Inst.* **109**, (2017).
19. Kachuri, L. *et al.* Principles and methods for transferring polygenic risk scores across global populations. *Nat. Rev. Genet.* **25**, 8–25 (2024).
20. Jin, J. *et al.* MUSSEL: Enhanced Bayesian polygenic risk prediction leveraging information across multiple ancestry groups. *Cell Genom.* **4**, (2024).

21. Zhang, J. *et al.* An ensemble penalized regression method for multi-ancestry polygenic risk prediction. *Nat. Commun.* **15**, 1–14 (2024).
22. Hou, K. *et al.* Admix-kit: an integrated toolkit and pipeline for genetic analyses of admixed populations. *Bioinformatics* **40**, (2024).
23. Hoggart, C. J. *et al.* BridgePRS leverages shared genetic effects across ancestries to increase polygenic risk score portability. *Nat. Genet.* **56**, 180–186 (2024).
24. Zhang, H. *et al.* A new method for multi-ancestry polygenic prediction improves performance across diverse populations. *Nat. Genet.* **55**, 1757–1768 (2023).
25. Zhou, G., Chen, T. & Zhao, H. SDPRX: A statistical method for cross-population prediction of complex traits. *Am. J. Hum. Genet.* **110**, 13–22 (2023).
26. Ruan, Y. *et al.* Improving polygenic prediction in ancestrally diverse populations. *Nat. Genet.* **54**, 573–580 (2022).
27. Shi, J. *et al.* Genome-wide association study of lung adenocarcinoma in East Asia and comparison with a European population. *Nature Communications* **2023 14:1** **14**, 1–17 (2023).
28. Hu, Z. *et al.* A genome-wide association study identifies two new lung cancer susceptibility loci at 13q12.12 and 22q12.2 in Han Chinese. *Nat. Genet.* **43**, 792–796 (2011).
29. Wang, L. *et al.* Genetically determined height was associated with lung cancer risk in East Asian population. *Cancer Med.* **7**, 3445–3452 (2018).
30. Dong, J. *et al.* Association analyses identify multiple new lung cancer susceptibility loci and their interactions with smoking in the Chinese population. *Nat. Genet.* **44**, 895–898 (2012).
31. Purcell, S. M. *et al.* Common polygenic variation contributes to risk of schizophrenia and bipolar disorder. *Nature* **460**, 748–752 (2009).
32. Chang, C. C. *et al.* Second-generation PLINK: Rising to the challenge of larger and richer datasets. *Gigascience* **4**, 7 (2015).
33. Privé, F., Arbel, J. & Vilhjálmsson, B. J. LDpred2: better, faster, stronger. *Bioinformatics* **36**, 5424–5431 (2021).
34. Bulik-Sullivan, B. K. *et al.* LD Score regression distinguishes confounding from polygenicity in genome-wide association studies. *Nat. Genet.* **47**, 291–295 (2015).
35. Hung, R. J. *et al.* Assessing Lung Cancer Absolute Risk Trajectory based on a Polygenic Risk Model. *Cancer Res* **81**, 1607 (2021).
36. Auton, A. *et al.* A global reference for human genetic variation. *Nature* **526**, 68–74 (2015).
37. Foucher, Y. *et al.* RISCA: Causal Inference and Prediction in Cohort-Based Analyses. *R package version 1.01* Preprint at <https://cran.r-project.org/package=RISCA> (2020).
38. Pal Choudhury, P. *et al.* iCARE: An R package to build, validate and apply absolute risk models. *PLoS One* **15**, e0228198 (2020).
39. Chien, L. H. *et al.* Predicting lung cancer occurrence in never-smoking females in Asia: TNSF-SQ, a prediction model. *Cancer Epidemiology Biomarkers and Prevention* **29**, 452–459 (2020).
40. Zhang, Y., Qi, G., Park, J. H. & Chatterjee, N. Estimation of complex effect-size distributions using summary-level statistics from genome-wide association studies across 32 complex traits. *Nat. Genet.* **50**, 1318–1326 (2018).

41. Choudhury, P. P. *et al.* iCARE: An R package to build, validate and apply absolute risk models. *PLoS One* **15**, (2020).
42. Wojcik, G. L. *et al.* Genetic analyses of diverse populations improves discovery for complex traits. *Nature* **570**, 514–518 (2019).
43. Duncan, L. *et al.* Analysis of polygenic risk score usage and performance in diverse human populations. *Nat. Commun.* **10**, (2019).
44. Kullo, I. J. *et al.* Polygenic scores in biomedical research. *Nat. Rev. Genet.* **23**, 524–532 (2022).
45. Martin, A. R. *et al.* Clinical use of current polygenic risk scores may exacerbate health disparities. *Nat. Genet.* **51**, 584–591 (2019).
46. Chang, G. C. *et al.* Low-dose CT screening among never-smokers with or without a family history of lung cancer in Taiwan: a prospective cohort study. *Lancet Respir Med* **12**, 141–152 (2024).
47. Wei, X. *et al.* Development and evaluation of a polygenic risk score for lung cancer in never-smoking women: A large-scale prospective Chinese cohort study. *Int. J. Cancer* **154**, 807–815 (2024).
48. Schaid, D. J., Sinnwell, J. P., Batzler, A. & McDonnell, S. K. Polygenic risk for prostate cancer: Decreasing relative risk with age but little impact on absolute risk. *The American Journal of Human Genetics* **109**, 900–908 (2022).
49. Krist, A. H. *et al.* Screening for Lung Cancer: US Preventive Services Task Force Recommendation Statement. *JAMA - Journal of the American Medical Association* **325**, 962–970 (2021).
50. Blechter, B. *et al.* Polygenic risk score, environmental tobacco smoke, and risk of lung adenocarcinoma in never-smoking women in Taiwan. *JAMA Netw. Open* **6**, E2339254 (2023).
51. Katki, H. A. *et al.* Increase in power by obtaining 10 or more controls per case when type-1 error is small in large-scale association studies. *BMC Med. Res. Methodol.* **23**, (2023).
52. Chen, T. *et al.* Genomic Insights for Personalized Care: Motivating At-Risk Individuals Toward Evidence-Based Health Practices. *medRxiv* 2024.03.19.24304556 (2024) doi:10.1101/2024.03.19.24304556.

## Data Availability

All data supporting the findings described in this paper are available in the paper and in the Supplementary Information and from the corresponding author or as otherwise indicated upon request. The individual genotype data for the FLCCA data are in dbGaP phs000716.v1.p1 (Genome-Wide Association Study of Lung Cancer Susceptibility in Never-Smoking Women in Asia). For the NCC and ACC studies, please contact Kouya Shiraishi at [kshirais@ncc.go.jp](mailto:kshirais@ncc.go.jp) or Takashi Kohno at [tkkohno@ncc.go.jp](mailto:tkkohno@ncc.go.jp) for summary statistics. The GWAS data for the European populations contributing to this study are available at dbGap under accession phs000877.v1.p1

(Transdisciplinary Research Into Cancer of the Lung (TRICL), [https://www.ncbi.nlm.nih.gov/projects/gap/cgi-bin/study.cgi?study\\_id=phs000876.v2.p1](https://www.ncbi.nlm.nih.gov/projects/gap/cgi-bin/study.cgi?study_id=phs000876.v2.p1)), phs001273.v3.p2 (Oncoarray Consortium, [https://www.ncbi.nlm.nih.gov/projects/gap/cgi-bin/study.cgi?study\\_id=phs001273.v3.p2](https://www.ncbi.nlm.nih.gov/projects/gap/cgi-bin/study.cgi?study_id=phs001273.v3.p2)). To gain access to all data in dbGaP cited in this paper, please apply for dbGaP Authorized Access. GWAS data for the European populations contributing to this study are available under accession phs000877.v1.p1 (ILLCO), phs001273.v1.p1 (OncoArray).

### **Code Availability**

Methods implemented and their corresponding repositories include: SCT and LDpred2 at <https://github.com/privefl/bigsnpr>, PRS-CSx at <https://github.com/getian107/PRScsx>. CT-SLEB at <https://github.com/andrewhaoyu/CTSLEB>, and GENESIS at <https://github.com/yandorazhang/GENESIS>.

PLINK: <https://www.cog-genomics.org/plink/1.9>.

Most of our statistical analyses were performed using the following R packages: ggplot2 v.3.3.3, dplyr v.1.0.4, data.table v.1.13.6, iCARE v.1.30.0

[https://github.com/KevinWFred/PRS\\_EASLC](https://github.com/KevinWFred/PRS_EASLC)
