# Supplementary material for: Stratifying Lung Adenocarcinoma Risk with Multi-ancestry Polygenic Risk Scores in East Asian Never-Smokers
Source: bioRxiv or medRxiv preprint supplement (doi:10.1101/2024.06.26.24309127), 2025-08-24
Supplement: Supplementary file [file media-1.pdf]

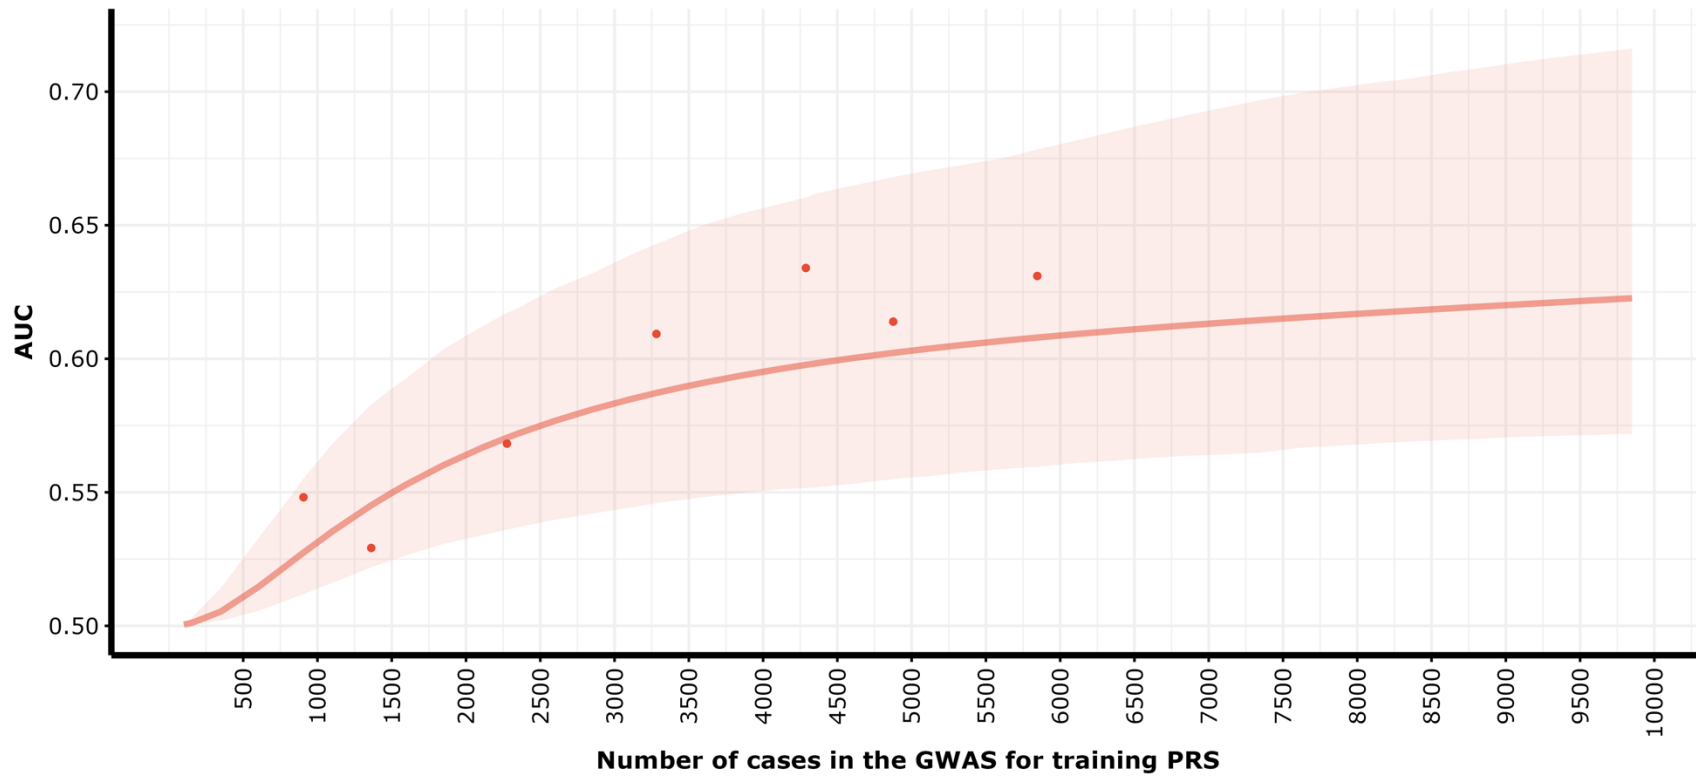

**Supplementary Figure 1. Observed LDpred2 PRS AUC on seven different case sample sizes and projected LDpred2 PRS AUC of case sample sizes in the range of [500, 10,000] (with case to control ratio of 1:1).** Dots represent observed AUC, the line represents the projected AUC, and the shaded area represents the 95% CI of projected AUC.

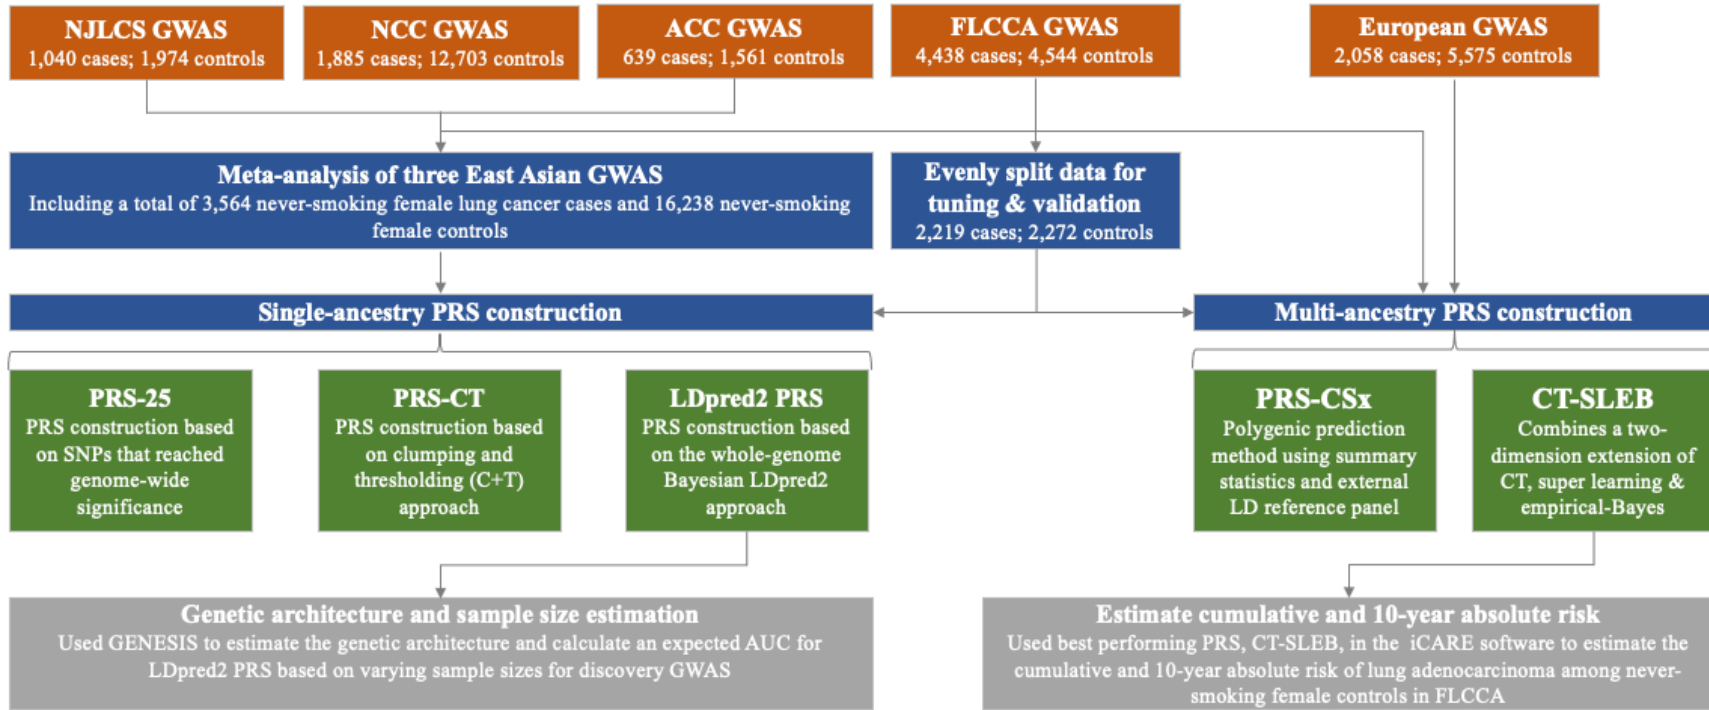

**Supplementary Figure 2. Overview of data structure, polygenic risk score (PRS) development, validation and application.** Summary statistics from a meta-analysis of East Asian (EAS) genome-wide association studies (GWAS), including samples from Nanjing Lung Cancer Study (NJLCS), National Cancer Center of Japan (NCC), and the Research Institute and Aichi Cancer Center (ACC) were used to develop single-ancestry PRS using methods such as a simple PRS constructed using 25 SNPs that have previously reached genome-wide significance (i.e.,  $P < 5 \times 10^{-8}$ ) (PRS-25), a PRS using the clumping and thresholding (CT) methods (PRS-CT), and a PRS using a genome-wide Bayesian-based approach, LDpred2 (LDpred2 PRS). For the multi-ancestry PRS development, we also used summary statistics from European (EUR) GWAS, applying the PRS-CSx method that leveraged genome-wide association summary statistics with a Bayesian continuous shrinkage prior to model SNP effect sizes across populations, as well as CT-SLEB method, which enhances the standard CT methods with a two-dimensional approach to select SNPs for EAS PRS construction. Tuning and validation of each PRS was conducted in the Female Lung Cancer Consortium in Asian, an independent EAS individual-level dataset. CT-SLEB PRS was used to estimate 10-year and lifetime cumulative absolute risk, and PRS-CT and PRS-LDpred2 were used for sample size projection.

A

B

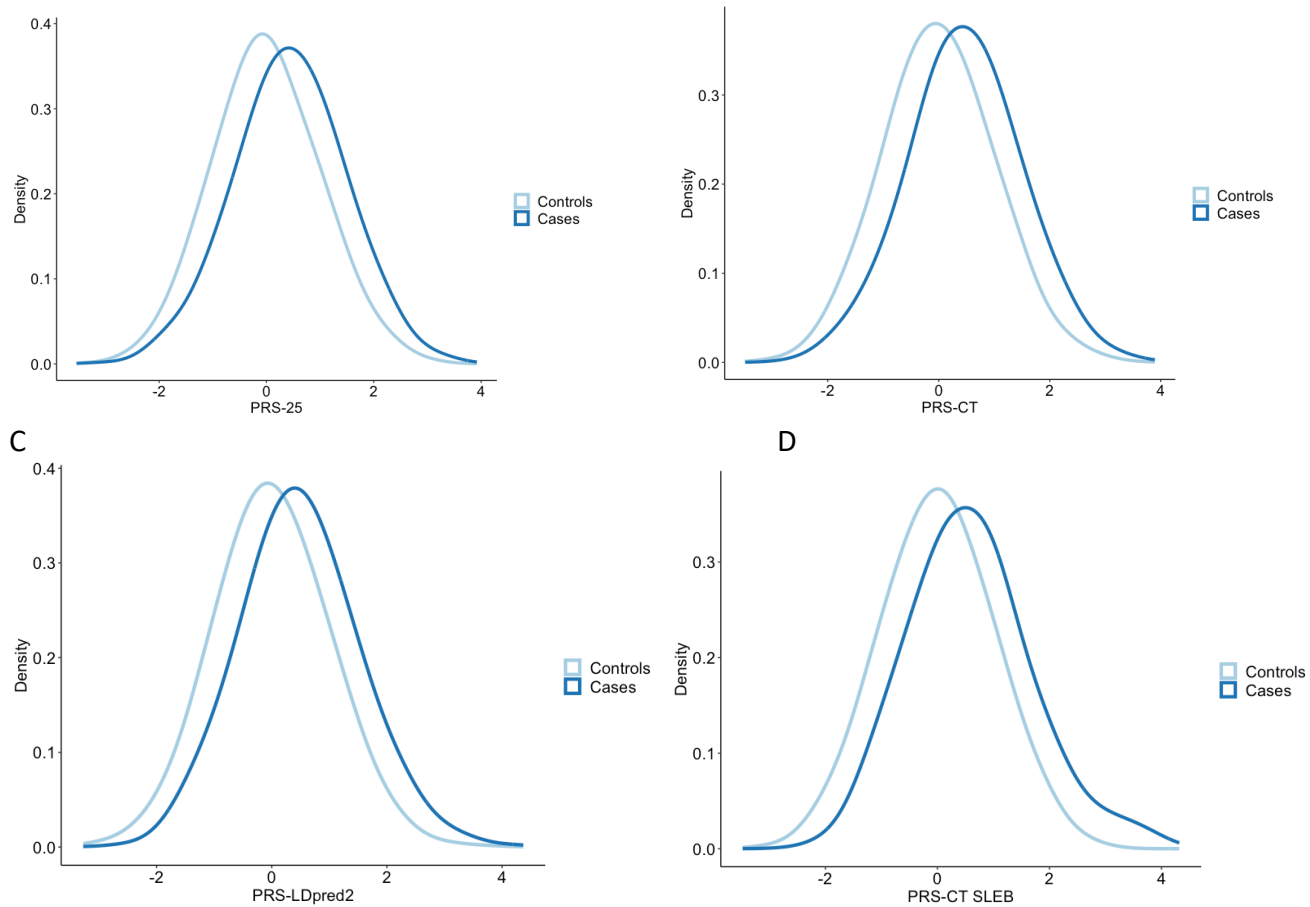

**Supplementary Figure 3. PRSs distribution in the Female Lung Cancer Consortium in Asia**

|             | PRS-25 |          |       | PRS-CT |          |       | LDpred2 PRS |          |       | CT-SLEB |          |       |
|-------------|--------|----------|-------|--------|----------|-------|-------------|----------|-------|---------|----------|-------|
|             | Cases  | Controls | Total | Cases  | Controls | Total | Cases       | Controls | Total | Cases   | Controls | Total |
| <b>Mean</b> | 0.43   | 0        | 0.21  | 0.34   | 0        | 0.17  | 0.51        | 0        | 0.25  | 0.58    | 0        | 0.29  |
| <b>SD</b>   | 1.03   | 1        | 1.04  | 1.03   | 1        | 1.03  | 1.08        | 1        | 1.07  | 1.11    | 1        | 1.09  |
